1 **D-alanylation of Teichoic Acids in *Bacilli* impedes the immune sensing of peptidoglycan in**  
2 ***Drosophila***

3 Zaynoun Attieh<sup>1,2</sup>, Mireille Kallassy Awad<sup>1</sup>, Agnès Rejasse<sup>2</sup>, Pascal Courtin<sup>2</sup>, Ivo Gomperts  
4 Boneca<sup>3,4</sup>, Marie-Pierre Chapot-Chartier<sup>2</sup>, Vincent Sanchis Borja<sup>2</sup> and Laure El Chamy<sup>1</sup>

5 1- Unité de Recherche Environnement, Génomique et Protéomique, Laboratoire de  
6 Biodiversité et Génomique Fonctionnelle, Faculté des sciences, Université Saint-  
7 Joseph de Beyrouth- Liban

8 2- Micalis Institute, INRA, AgroParisTech, Université Paris-Saclay, 78350 Jouy-en-  
9 Josas, France

10 3- Institut Pasteur, Unité biologie et génétique de la paroi bactérienne, 75724 Paris  
11 cedex 15, France

12 4- INSERM, Equipe Avenir, 75015 Paris, France

13 Corresponding: [laure.chamy@usj.edu.lb](mailto:laure.chamy@usj.edu.lb);  
14 [vincent.sanchis-borja@inra.fr](mailto:vincent.sanchis-borja@inra.fr)

15 **Abstract**

16 Modification of cell wall components is a prominent mean for pathogens to hinder host immune  
17 defenses. Here, using the *Drosophila* model, we aimed at characterizing the role of D-alanine  
18 esterification of teichoic acids (TAs) in the resistance of *Bacillus thuringiensis* to host defenses  
19 *in vivo*. We show that, by preventing cationic antimicrobial effectors-mediated bacterial lysis,  
20 this cell wall modification also limits the release of peptidoglycan immunostimulatory fragments  
21 thus impeding their sensing and the subsequent induction of the IMD- NF-κB pathway.  
22 Interestingly, we show that this strategy is also adopted by *Lactobacillus plantarum*, a *bona fide*  
23 commensal, to fine-tune its immunomodulatory potential in the *Drosophila* gut. Markedly, we  
24 show that the D-alanylation of TAs is essential for the resistance of *L. plantarum* to gut  
25 lysozyme. Altogether our data shed light on the mechanism underlying the persistence and the  
26 low immunostimulatory potential of *L. plantarum* in the *Drosophila* gut.

## 27 **Introduction**

28 The external surface of microorganisms is a central platform for interactions with multicellular  
29 hosts. Evolutionarily selected Pattern Recognition Receptors (PRRs) of the innate immune  
30 system sense key microbial surface molecules such as fungal glucans, Gram-negative bacterial  
31 lipopolysaccharide (LPS), Gram-positive bacterial Peptidoglycan (PGN) and Teichoic Acids  
32 (TAs) to alert the host of the microbial non-self and to initiate immune responses (Medzhitov,  
33 2007). PRRs, such as the Toll-like receptors and NOD-like receptors act at the forefront of the  
34 mucosal immune barrier. They control the expression of several immune induced genes such as  
35 antimicrobial peptides (AMPs) and cytokines, the differential profiles of which dictate the  
36 outcome of the ensued immune response (Hold, Mukhopadhyaya, & Monie, 2011). Therefore,  
37 several hypotheses consider microbial surface molecules as plausible candidates for effector  
38 probiotic molecules (Kleerebezem et al., 2010). Likewise, several pathogens have evolved  
39 specialized mechanisms to modify their external surface in order to avoid detection or to develop  
40 resistance to potent, highly conserved, immune effectors such as AMPs and lysozymes (Anaya-  
41 Lopez, Lopez-Meza, & Ochoa-Zarzosa, 2013; Bechinger & Gorr, 2017; Koprivnjak & Peschel,  
42 2011; Ragland & Criss, 2017). In humans, both lysozyme and AMPs are expressed at surface  
43 epithelial cells as well as in phagocytes and thus act at the frontline of the host defenses  
44 (Dommett, Zilbauer, George, & Bajaj-Elliott, 2005). Most AMPs are small cationic molecules  
45 with a pronounced amphipathy, a property that accounts, as commonly agreed, for their  
46 membrane targeting microbicidal activity. According to the model, AMPs are preferentially  
47 attracted to negatively charged surfaces of the microbial cell envelopes where they get embedded  
48 into the hydrophobic regions of the lipid membranes, thereby leading to membrane  
49 destabilization and ultimately to cell death (Joo, Fu, & Otto, 2016). Lysozyme comprises an  
50 evolutionarily conserved family of bactericidal proteins that are found in species ranging from  
51 bacteriophages to man (Dommett et al., 2005). Their canonical killing mechanism relies on their

52 muramidase activity, which cleaves the  $\beta$ -(1,4)-glycosidic bond between N-acetylmuramic acid  
53 and N-acetylglucosamine moieties of the bacterial cell wall peptidoglycan. Resulting loss of cell  
54 wall integrity leads to rapid cell lysis and death (Callewaert & Michiels, 2010; Ragland & Criss,  
55 2017). The cationic nature of lysozyme is very important for bactericidal activity since it favors  
56 its binding to the negatively charged bacterial cell envelop and hence access to the PGN  
57 substrate.

58 In addition to the thick layer of PGN, the cell wall of Gram-positive bacteria is characterized by  
59 the presence of highly charged anionic polymers of repeating alditol phosphate residues called  
60 Teichoic acids (TAs). TAs represent the most abundant component of Gram-positive bacterial  
61 cell wall and play crucial roles in their pathogenesis (Brown, Santa Maria, & Walker, 2013; Joo  
62 et al., 2016). Notably, modification of TAs by addition of positively charged D-alanine esters  
63 residues reduces their net negative charge thus lowering the attraction of cationic antimicrobial  
64 peptides to the bacterial cell wall. This process is performed by the gene products of the *dlt*  
65 operon that is highly conserved in most Gram-positive bacteria including probiotic and  
66 pathogenic species (Abachin et al., 2002; Abi Khattar et al., 2009; Heaton & Neuhaus, 1992;  
67 Kristian et al., 2005; Perego et al., 1995; Peschel et al., 1999). According to currently available  
68 genome sequences, the *dlt* operon comprises four to five genes, *dltXABCD* (Abi Khattar et al.,  
69 2009; Kamar et al., 2017; Perego et al., 1995). DltA is a D-alanine-D-alanyl carrier protein ligase  
70 that catalyzes the D-alanylation of the D-alanyl carrier protein DltC (Debabov et al., 1996;  
71 Heaton & Neuhaus, 1992, 1994). The roles of DltX, DltB and DltD are less clear (Debabov,  
72 Kiriukhin, & Neuhaus, 2000; Kamar et al., 2017; Neuhaus & Baddiley, 2003). Nevertheless, in  
73 all tested Gram-positive bacteria species, genetic disruption of any of the five genes of the *dlt*  
74 operon completely abrogates its function. Compared to wild-type strains, *dlt* mutants have a  
75 higher negative charge on the cell surface and are significantly susceptible to cationic  
76 antimicrobial effectors including AMPs and lysozyme (Fabretti et al., 2006; Kovacs et al., 2006;

77 Kristian et al., 2005; Kristian et al., 2003; Perea Velez et al., 2007). In addition, *in vivo* studies  
78 clearly show a significantly attenuated virulence of the *dlt* mutants compared to wild-type strains  
79 of many human pathogens (Abachin et al., 2002; Abi Khattar et al., 2009; Fisher et al., 2006;  
80 Perego et al., 1995; Peschel et al., 1999; Poyart et al., 2003). However, despite deep interest in  
81 the characterization of the function of the *dlt* operon, our understanding of its exact role in the  
82 bacterial resistance to the innate immune system *in vivo* remains limited.

83 *Drosophila* has long emerged as a well-suited model for the study of host-pathogen interactions  
84 (Ferrandon, 2013; Lemaitre & Hoffmann, 2007). The hallmark of the *Drosophila* host defense is  
85 the immune-induced expression of genes encoding potent AMPs (Ferrandon, Imler, Hetru, &  
86 Hoffmann, 2007; Lemaitre & Hoffmann, 2007). These peptides are synthesized by the fat body  
87 cells (the fly immune organ) and secreted into the hemolymph where they constitute the main  
88 effectors of the humoral systemic response. AMPs are also produced locally at the epithelial  
89 barriers such as the gut, where they act synergistically with ROS to limit the infections  
90 (Ferrandon, 2013; Imler & Bulet, 2005). Two highly conserved NF- $\kappa$ B signaling cascades, the  
91 Toll and the Immune Deficiency (IMD) pathways, control the expression of AMP genes.  
92 Whereas both pathways contribute to the regulation of the systemic immune response, only the  
93 latter regulates the expression of AMP genes in the gut through the activation of the NF- $\kappa$ B  
94 transcription factor Relish (El Chamy, Matt, Ntwasa, & Reichhart, 2015; Ferrandon, 2013). The  
95 IMD pathway is elicited upon the sensing of DAP-type PGN fragments by members of the  
96 Peptidoglycan Recognition Protein (PGRP) receptors family; the membrane bound PGRP-LC  
97 and the intracellular PGRP-LE (Chang, Chelliah, Borek, Mengin-Lecreulx, & Deisenhofer,  
98 2006; Chang et al., 2005; Choe, Lee, & Anderson, 2005; Choe, Werner, Stoven, Hultmark, &  
99 Anderson, 2002; Gottar et al., 2002; Kaneko et al., 2004; Kaneko et al., 2006; Leulier et al.,  
100 2003; Mellroth & Steiner, 2006; Ramet, Manfruelli, Pearson, Mathey-Prevot, & Ezekowitz,  
101 2002). Potential immune effectors, such as lysozymes are also expressed at the epithelial barrier

102 (Daffre, Kylsten, Samakovlis, & Hultmark, 1994). However, their global contribution to the host  
103 defense and intestinal homeostasis remains obscure. More recently, *Drosophila* has become a  
104 powerful model for the characterization of the molecular mechanisms underlying the mutualistic  
105 host-microbiota interactions (Erkosar & Leulier, 2014; W. J. Lee & Brey, 2013; Ma, Storelli,  
106 Mitchell, & Leulier, 2015). Indeed, several studies have proven the relative simplicity of the fly  
107 intestinal microbiota, which comprises approximately 30 phylotypes with a major representation  
108 of *Lactobacillaceae* and *Acetobacteraceae* (Blum, Fischer, Miles, & Handelsman, 2013;  
109 Chandler, Lang, Bhatnagar, Eisen, & Kopp, 2011; Corby-Harris et al., 2007; Cox & Gilmore,  
110 2007; Staubach, Baines, Kunzel, Bik, & Petrov, 2013; C. N. Wong, Ng, & Douglas, 2011).  
111 Reports have begun to illustrate the impact of this microbial community on the *Drosophila* host  
112 biology (Buchon, Broderick, Chakrabarti, & Lemaitre, 2009; Iatsenko, Boquete, & Lemaitre,  
113 2018; Jones et al., 2013; Sharon et al., 2010; Shin et al., 2011; Storelli et al., 2011; A. C. Wong,  
114 Dobson, & Douglas, 2014). Notably, the gut commensals largely influence the *Drosophila*  
115 midgut transcriptome and promote the expression of genes associated with gut physiology and  
116 metabolism as well as tissue homeostasis and immune defenses (Broderick, Buchon, & Lemaitre,  
117 2014; Erkosar & Leulier, 2014). Interestingly, some *Lactobacillus plantarum* strains recapitulate  
118 the benefits of a *bona fide* *Drosophila* commensal thus providing a simple model for the  
119 investigation of the intricate mechanisms underlying the impact of intestinal bacteria on host  
120 physiology and mucosal immunity (Jones et al., 2013; Storelli et al., 2011). In this context, high  
121 throughput analyses have shown that the gut-associated bacteria set an immune barrier in the  
122 *Drosophila* gut through the activation of a transcriptional program that is largely dependent on  
123 the IMD pathway (Bosco-Drayon et al., 2012; Broderick et al., 2014; Buchon et al., 2009; Ryu et  
124 al., 2008). Remarkably though, the expression of AMP genes remains at its basal level compared  
125 to that induced upon an oral infection (Bosco-Drayon et al., 2012) and any alteration in this  
126 transcriptional profile leads to commensal dysbiosis, which dramatically affects the host fitness

127 and lifespan (Bonney et al., 2013; Broderick et al., 2014; Ryu et al., 2008). Recent studies have  
128 shown that the immune response is compartmentalized in the *Drosophila* gut (Bosco-Drayon et  
129 al., 2012; Buchon, Broderick, & Lemaitre, 2013) and that multiple negative regulators intervene  
130 at different levels of the IMD pathway in order to fine-tune its activation (Aggarwal &  
131 Silverman, 2008; Bischoff et al., 2006; Guo, Li, & Lin, 2014; Kleino et al., 2008; Lhocine et al.,  
132 2008; Mellroth, Karlsson, & Steiner, 2003; Paredes, Welchman, Poidevin, & Lemaitre, 2011;  
133 Ryu et al., 2004; Zaidman-Remy et al., 2006). Among these negative regulators are catalytic  
134 members of the PGRP family, such as PGRP-SC and PGRP-LB, which degrade PGN fragments  
135 into non-immunostimulatory moieties and the intracellular protein, Pirk, which binds to the  
136 PGRP-LC and PGRP-LE receptors thus disrupting downstream signaling complex (Aggarwal et  
137 al., 2008; Kleino et al., 2008; Kleino et al., 2017; Lhocine et al., 2008). However, similarly to  
138 infectious bacteria, *L. plantarum* and the major elements of the fly microbiota produce DAP-type  
139 PGN and most of the IMD negative regulators act in a feedback loop. Thus, what makes this  
140 microbial community only a mild inducer of the AMP genes and how it is tolerated in the  
141 *Drosophila* gut remains intriguing (Bosco-Drayon et al., 2012).

142 Here, using the *Drosophila* model, we aimed at a better characterization of the intricate *dlt*-  
143 dependent mechanisms that allow bacteria to resist the innate immune response *in vivo*. Our  
144 results show that, D-alanylation of TAs impedes the sensing of PGN from *B. thuringiensis* in  
145 *Drosophila* thus hampering the activation of the IMD pathway upon a systemic infection. This  
146 mechanism is also used by *L. plantarum* to fine-tune its induced immune response in the  
147 *Drosophila* gut. In particular, we show that the D-alanylation of TAs is essential for the  
148 resistance of *L. plantarum* to intestinal lysozyme and thus for its persistence a core component of  
149 the *Drosophila* microbiota but also for the modulation of its ensued NF- $\kappa$ B-dependent epithelial  
150 immune response.

## 151 **Results**

### 152 **Beyond resistance to AMPs, D-alanylation of TAs in *Bacilli* prohibits the systemic** 153 **activation of the *Drosophila* IMD pathway**

154 We have recently shown that *B. thuringiensis* is highly virulent to adult *Drosophila* in a septic  
155 injury infection model. Using a *dltX* mutant of *B. thuringiensis* 407 Cry<sup>-</sup> strain (*Bt407ΔdltX*), we  
156 showed that this phenotype is completely dependent on the D-alanylation of its TAs, which  
157 confers resistance to the IMD-dependent humoral immune response (Kamar et al., 2017). Here,  
158 we assess whether this phenotype is due to the resistance of *Bt407* to cationic AMPs *in vivo*. For  
159 that, we resorted to a rescue experiment of the susceptibility of adult flies to the infections by the  
160 wt and the *dlt* mutants of *Bt407* via the overexpression of *Cecropin*, an-IMD responsive gene  
161 encoding a cationic AMP. *Cecropin* overexpression was driven by the UAS-Gal4 system in  
162 *Drosophila* using the fat-body specific driver c564-Gal4 (Harrison, Binari, Nahreini, Gilman, &  
163 Perrimon, 1995) (Figure 1 – figure supplement 1). In addition to our previously published  
164 *Bt407ΔdltX* mutant, our survival experiments employed a full *dlt*-operon deletion mutant,  
165 *Bt407Δdlt*, which we generated by allelic exchange with a kanamycin resistance cassette (see  
166 experimental procedures). Loss of function of the *dlt* operon was confirmed by quantification of  
167 D-Alanine esterified to TAs by HPLC analysis, which proved impaired D-alanylation of TAs in  
168 the *Bt407Δdlt* mutant as compared to the wt strain (Figure 1 – figure supplement 2). The survival  
169 curves of infected adult flies presented in Figure 1 clearly show that *Bt407* is highly virulent to  
170 both wt and *relish* mutant flies whereas the *Bt407ΔdltX* and *Bt407Δdlt* mutants are only  
171 pathogenic to the latter (Figure 1 A and C). In addition, the similar susceptibility of wt flies and  
172 *relish* mutants to the *Bt407* infection is mirrored by the rate of bacterial growth in the  
173 hemolymph of the infected flies (Figure 1 B and D). The bacterial loads are equivalent to those  
174 retrieved from *relish* mutants upon an infection with *Bt407Δdlt* and *Bt407ΔdltX* (Figure 1 B and  
175 D). These results confirm that the D-alanylation of TAs confers *Bt407* resistance to the systemic

176 humoral immune response in *Drosophila*. Moreover, whereas the overexpression of *Cecropin*  
177 does not alter the virulent phenotype of *Bt407*, it significantly ameliorates the survival of the wt  
178 flies and completely rescues the phenotype of the *relish* mutants when infected with the  
179 *Bt407ΔdltX* and *Bt407Δdlt* (Figure 1A and C). These results correlate with the cessation of  
180 bacterial growth in the hemolymph of surviving infected flies (Figure 1 B and D). Altogether,  
181 these results indicate that D-alanylation of TAs in *Bt407* confers resistance to Cecropin *in vivo*.  
182 This phenotype is strictly dependent on the activity of the *dlt* operon as complementation of the  
183 *Bt407ΔdltX* mutant with the *dltX*-ORF (*Bt407ΔdltΩdltX*) completely restores a virulence similar  
184 to that of the wt *Bt407* strain (Figure 1 – figure supplement 3).



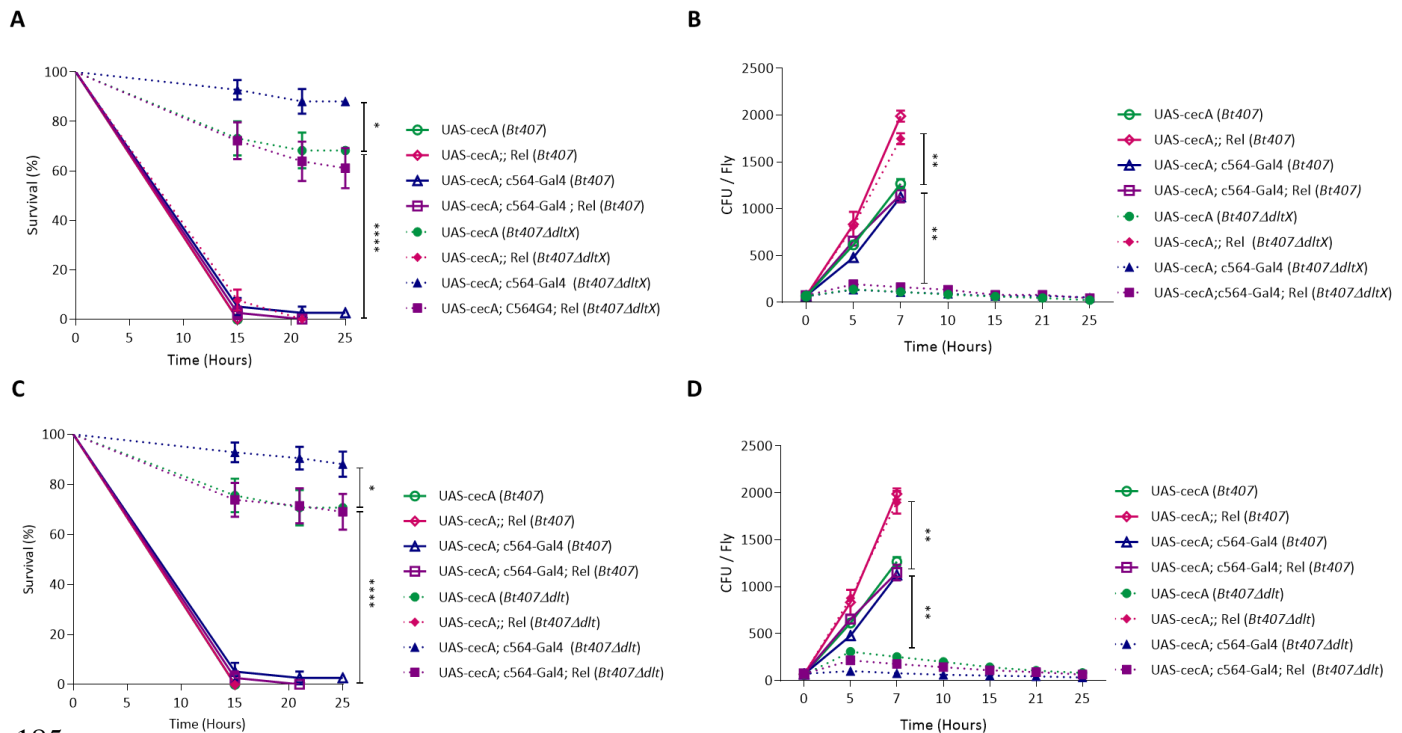

185

186 **Figure 1: D- alanylation of TAs confers *Bacillus thuringiensis* resistance to the AMP-dependent systemic**  
 187 **immune response in *Drosophila***

188 (A and C) Survival of adult wild-type (wt) or relish (*Rel*) mutant, overexpressing or not a *Cecropin A* transgene  
 189 (under the control of the c564-Gal4 fat body driver) to an infection with *Bt407*, *Bt407ΔdltX* (A) and *Bt407Δdlt* (C).  
 190 (B and D) Internal bacterial loads retrieved from adult flies infected with *BT407* and *Bt407ΔdltX* (B) or *Bt407Δdlt*  
 191 (D). The Colony Forming Unit (CFU) counting was performed only on survival flies.

192 Data are pooled from three independent experiments (mean and s.d.). Statistical tests were performed using the Log  
 193 Rank test for the survival assays and Mann-Whitney test for the CFU counting within Prism software (ns:  $p > 0.05$ ;  
 194 \*  $0.01 < p < 0.05$ ; \*\*:  $0.001 < p < 0.01$ ; \*\*\*:  $0.0001 < p < 0.001$ ; \*\*\*\*:  $p < 0.0001$ ). The exact  $p$  values are listed in  
 195 Figure 1 – source data 1.

196 The following source data and figure supplements are available for figure 1:

197 **Source data 1.**  $p$  values for figure 1

198 **Figure supplement 1.** Overexpression of *CecropinA* gene.

199 **Figure supplement 2.** Amounts of D-alanine released from whole cells by alkaline hydrolysis for the wild type and  
 200 the *dlt* mutant strains of *Bt407*.

201 **Figure supplement 3.** Complementation of the *Bt407ΔdltX* mutant with the *dltX-ORF* (*Bt407ΔdltΔdltX*) completely  
 202 restores its virulence similarly to the wt *Bt407* strain.

203 Since the D- alanylation of TAs conveys a modification of the bacterial surface, we assessed  
204 whether it affects the sensing of *Bt* by the *Drosophila* innate immune system. Hence, in order to  
205 compare the activation of the IMD pathway by *Bt407* and the  $\Delta dlt$  mutants, we infected the flies  
206 by septic injury and quantified the expression of *Diptericin*, an AMP-encoding gene, four hours  
207 following infection. The *Bt*- triggered *Diptericin* expression was compared to that induced by  
208 *Escherichia coli*, a conventionally used microbial inducer of the IMD pathway (Dushay, Asling,  
209 & Hultmark, 1996; Hedengren et al., 1999; Kaneko et al., 2004; Leulier et al., 2003). As shown  
210 in Figure 2A, *Bt407* is only a mild-inducer of the IMD pathway as compared to *E. coli*.  
211 However, both *Bt407* $\Delta dltX$  and *Bt407* $\Delta dlt$  infection result in *Diptericin* expression level similar  
212 to that induced by *E. coli*. This response is strictly dependent on the activation of the IMD  
213 pathway since it is abolished in *PGRP-LC* and *relish* mutant flies. The phenotype is completely  
214 reverted in the *Bt407* $\Delta dltX$  complemented strain (*Bt407* $\Delta dltX\Omega dltX$ ) (Figure 2A). Similar results  
215 were obtained from another read-out of the IMD pathway, *Attacin D* (Figure 2B). Altogether,  
216 our results indicate that beyond resistance to AMPs, the D-alanylation of TAs impedes the  
217 sensing of *Bt407* by the innate immune system, thus significantly reducing its immune-  
218 stimulatory potential and further contributing to its pathogenicity in *Drosophila*.

219 Next, we asked whether this mechanism of *dlt*-dependent camouflage of *Bt* is also used by other  
220 *Bacilli* species. Therefore, we checked for the immune induction of the IMD response in flies  
221 infected with a wt *Bacillus subtilis* (*B. subtilis*) and its *dlt* mutant (*B. subtilis* $\Delta dlt$ ). As shown in  
222 figure 2C, the *Diptericin* expression profile elicited by these bacterial strains is equivalent to  
223 that activated upon the infection of the flies by *Bt407* and the *Bt407* $\Delta dlt$  mutant respectively.  
224 These data suggest that the *dlt* function results in a restricted elicitation of the IMD pathway  
225 also in *Bacilli*. To exclude that the limited induction of the IMD pathway results from its active  
226 inhibition from live *Bacilli*, we repeated these experiments using heat killed bacteria and found  
227 similar results (Figure 2D and 2E). We conclude that the D-alanylation of TAs highly masks  
228 PGN from sensing by PGRP-LC.

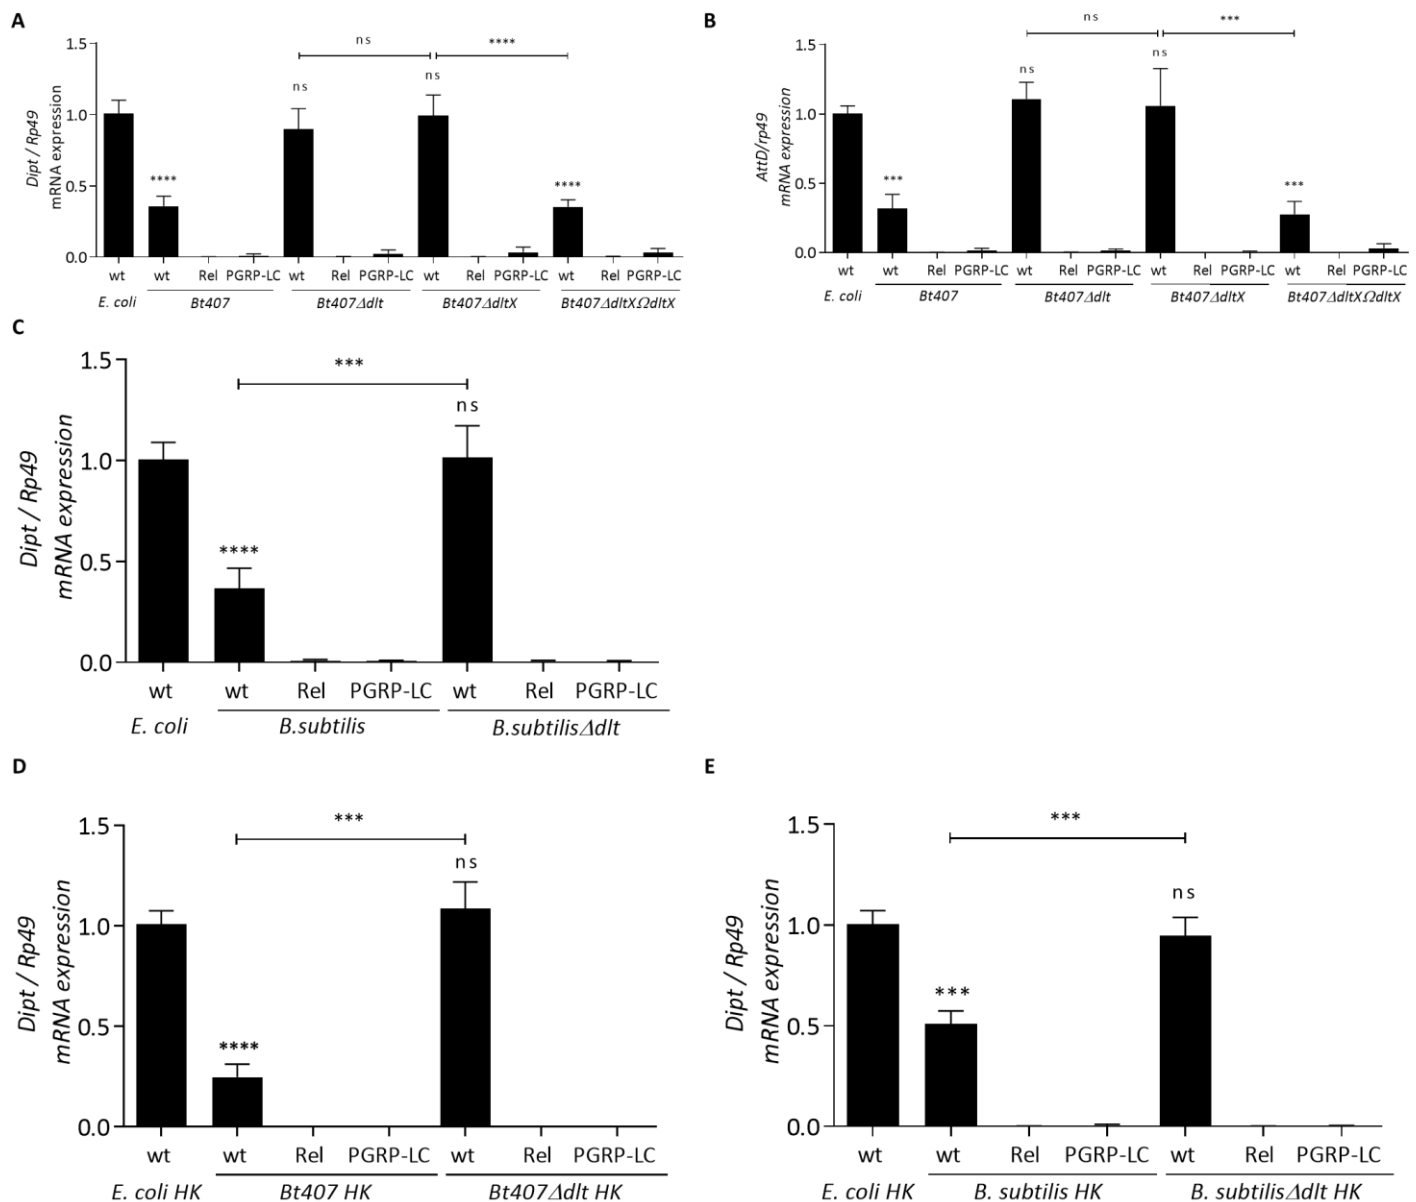

229

230 **Figure 2: The D- alanylation of TAs confines the induction of the IMD pathway upon a systemic infection of**  
 231 ***Drosophila* by *Bacilli*.**

232 Relative expression of the *Diptericin* (*Dipt*) (A, C D and E) or *Attacin D* (*AttD*) (B) transcripts in wild-type (wt) or  
 233 *relish* (*Rel*) mutant flies induced by living or heat-killed *Bt407*, *Bt407Δdlt*, *Bt407ΔdltX* and *Bt407ΔdltXΩdltX* (A, B  
 234 and D) or *B. subtilis* (C and E). Transcripts expression was measured by RT-qPCR in total RNA extracts 4 hours  
 235 upon the induction. Ribosomal protein 49 (Rp49) transcript was used as reference gene. Transcripts levels are  
 236 compared to that triggered in wt flies infected by *E. coli* as a control.

237 Data obtained from three independent experiments are combined in single value (mean ± sd). Statistical tests were  
 238 performed using the Mann-Whitney test within Prism software (ns:  $p > 0.05$ ; \*  $0.01 < p < 0.05$ ; \*\*  $0.001 < p < 0.01$ ;  
 239 \*\*\*:  $0.0001 < p < 0.001$ ; \*\*\*\*:  $p < 0.0001$ ). The exact  $p$  values are listed in Figure 2 – source data 1.

240 The following source data is available for figure 2:

241 **Source data 1.**  $p$  values for figure 2

242 **D-alanylation of TAs is essential for the persistence of *Lactobacillus plantarum* in the**  
243 ***Drosophila* gut and the modulation of its immune-stimulatory potential as a core**  
244 **component of the gut-associated microbiota**

245 In keeping with the role of D-alanine esterification of TAs in the resistance of *Bacilli* to  
246 antimicrobial effectors and the dampening of their IMD- eliciting potential, we asked whether  
247 this phenomenon would also account for the intestinal immune-tolerance of *L. plantarum* as a  
248 prevalent member of *Drosophila* microbiota. Therefore, we first determined whether the D-  
249 alanylation of TAs is required for the colonization and the persistence of *L. plantarum* in the  
250 *Drosophila* gut. The previously characterized *L. plantarum*<sup>WJL</sup> strain (*Lp*<sup>WJL</sup>), which was isolated  
251 from the intestine of *Drosophila melanogaster*, has a low transformation efficiency, which  
252 makes it difficult for site directed mutagenesis of the *dlt* operon. Therefore, we used the *L.*  
253 *plantarum*<sup>WCFSI</sup> strain (*Lp*<sup>WCFSI</sup>), isolated from human saliva, and its previously characterized *dlt*  
254 mutant (*Lp*<sup>WCFSI</sup>Δ*dlt*) (Hayward & Davis, 1956) (Kleerebezem et al., 2003; Palumbo et al., 2006).  
255 In a recent study, Newell *et al.* have reported that the *Lp*<sup>WCFSI</sup> strain shares the same ability as the  
256 *Lp*<sup>WJL</sup> strain to colonize the *Drosophila* gut (Newell et al., 2014). These data were further  
257 confirmed in our hands (Figure 3 – figure supplement 1) thus; we checked whether *Lp*<sup>WCFSI</sup>  
258 reproduced the same *Lp*<sup>WJL</sup> triggered IMD-dependent immune response when introduced in the  
259 flies. For that, adult flies were fed on a mixture of antibiotics for three days to generate gut germ  
260 free flies (GF) (Stein, Roth, Vogelsang, & Nüsslein-Volhard), which were then recolonized with  
261 physiological quantities of the different strains of *L. plantarum* (Bonnay et al., 2013; Storelli et  
262 al., 2011). GF and recolonized states were attested by plating the dissected guts on appropriate  
263 agar media. The comparison of the *Diptericin* expression levels in the guts of flies  
264 conventionally reared on cornmeal agar medium (CR) to that of GF flies, shown in Figure 3 –  
265 figure supplement 1, indicates that the gut microbiota sets an IMD- dependent immune response.  
266 This immune response is mildly but significantly induced in guts recolonized with *Lp*<sup>WJL</sup> and

267  $Lp^{WCFSI}$  as compared to GF guts. These results are in line with data previously reported by  
268 Bosco-Drayon *et al.* showing that  $Lp^{WJL}$  is a mild inducer of AMP genes in the gut. These  
269 authors also reported that  $Lp^{WJL}$  most potently activates the expression of genes encoding  
270 negative regulators of the IMD pathway such as *pirk* and *PGRP-SC1*. These results were also  
271 confirmed for the  $Lp^{WCFSI}$  strain (Figure 3 – figure supplement 1). Collectively, our results attest  
272 that  $Lp^{WCFSI}$  reproduces the IMD-dependent immune response activated by the *Drosophila* native  
273 gut associated  $Lp^{WJL}$  strain. Therefore, we pursued our analysis by checking whether the *dlt*  
274 operon is required for the persistence of *L. plantarum* in the *Drosophila* gut. According to recent  
275 data, the *Drosophila* microbial community is sustained by continuous replenishment through  
276 feeding (Blum *et al.*, 2013). Likewise, work from Leulier’s laboratory have previously shown  
277 that upon association in gnotobiotic flies, *L. plantarum* colonizes the *Drosophila* midgut and its  
278 external culture medium and resists the passage through the digestive tract of its host (Storelli *et*  
279 *al.*, 2011). Therefore, in order to evaluate the persistence of the wt and *dlt* mutant strains in the  
280 *Drosophila* gut, GF adult flies were monoassociated by feeding on  $Lp^{WCFSI}$  or the  $Lp^{WCFSI}\Delta dlt$   
281 mutant strains for three days and then transferred to fresh cornmeal agar medium vials. The  
282 bacterial loads in the fly guts were assessed on daily basis. As shown in Figure 3A, the bacterial  
283 count remained invariable in the guts of wt flies mono-associated with  $Lp^{WCFSI}$  whereas it  
284 significantly declined in the guts of the flies recolonized by the  $Lp^{WCFSI}\Delta dlt$  mutant. In contrast,  
285 the bacterial loads of both wt and  $Lp^{WCFSI}\Delta dlt$  mutants remained invariable in the guts of mono-  
286 associated *relish* mutants (Figure 3A). These results suggest that the D-alanylation of TAs is  
287 required for the resistance of *L. plantarum* to the IMD-dependent immune response and its  
288 subsequent persistence in the *Drosophila* gut. To further check whether this persistence  
289 particularly stems from the *dlt*-dependent resistance of *L. plantarum* to cationic antimicrobial  
290 effectors, we examined the persistence of the wt and *dlt* mutant strains of  $Lp^{WCFSI}$  in the guts of  
291 transgenic flies overexpressing *Cecropin* (Figure 3 – figure supplement 2). As shown in Figure

292 3A, the counts of the wt  $Lp^{WCFSI}$  strain were constant in the guts of the recolonized flies despite  
293 the overexpression of Cecropin, whereas those of the  $Lp^{WCFSI\Delta dlt}$  mutant strain dramatically  
294 declined in less than four days. Altogether, these data underline a role of the *dlt* operon in the  
295 resistance of  $Lp^{WCFSI}$  to cationic antimicrobial effectors thus favoring its persistence in the  
296 *Drosophila* gut.

297 Next, we questioned whether the D-alanylation of TAs influenced the immune-stimulatory  
298 potential of *L. plantarum* in the intestine. To this end, we compared the intensity of the IMD  
299 response elicited in the guts of GF flies monoassociated with either  $Lp^{WCFSI}$  or  $Lp^{WCFSI\Delta dlt}$ . As  
300 shown in Figure 3B, the  $Lp^{WCFSI\Delta dlt}$  mutant triggers a significantly accentuated immune  
301 response in the *Drosophila* gut as compared to that induced by the wt  $Lp^{WCFSI}$  strain.  
302 Remarkably, the *Diptericin* expression level activated upon the sensing of  $Lp^{WCFSI\Delta dlt}$  exceeds  
303 that of the negative regulators encoding genes (Figure 3C and 3D). The expression of all induced  
304 genes is strictly dependent on the activation of the IMD pathway as attested by the phenotype of  
305 *relish* or the *PGRP-LC/LE* double mutants (Figure 3B, 3C and 3D). These results contrast with  
306 those obtained for the wt  $Lp^{WCFSI}$  strain. Of note, flies were daily transferred to new vials  
307 supplemented by the corresponding bacterial strains and variations in the ingested bacterial loads  
308 were excluded by the comparison of the CFU counts in the guts of flies monoassociated with the  
309 wt  $Lp^{WCFSI}$  or the  $Lp^{WCFSI\Delta dlt}$  mutant strains (Figure 3 – figure supplement 3). Taken together,  
310 our data indicate that the D-alanylation of TAs in *L. plantarum* is essential for the immune-  
311 modulatory potential of *L. plantarum* and its persistence in the *Drosophila* gut as a prevalent  
312 element of its microbiota.

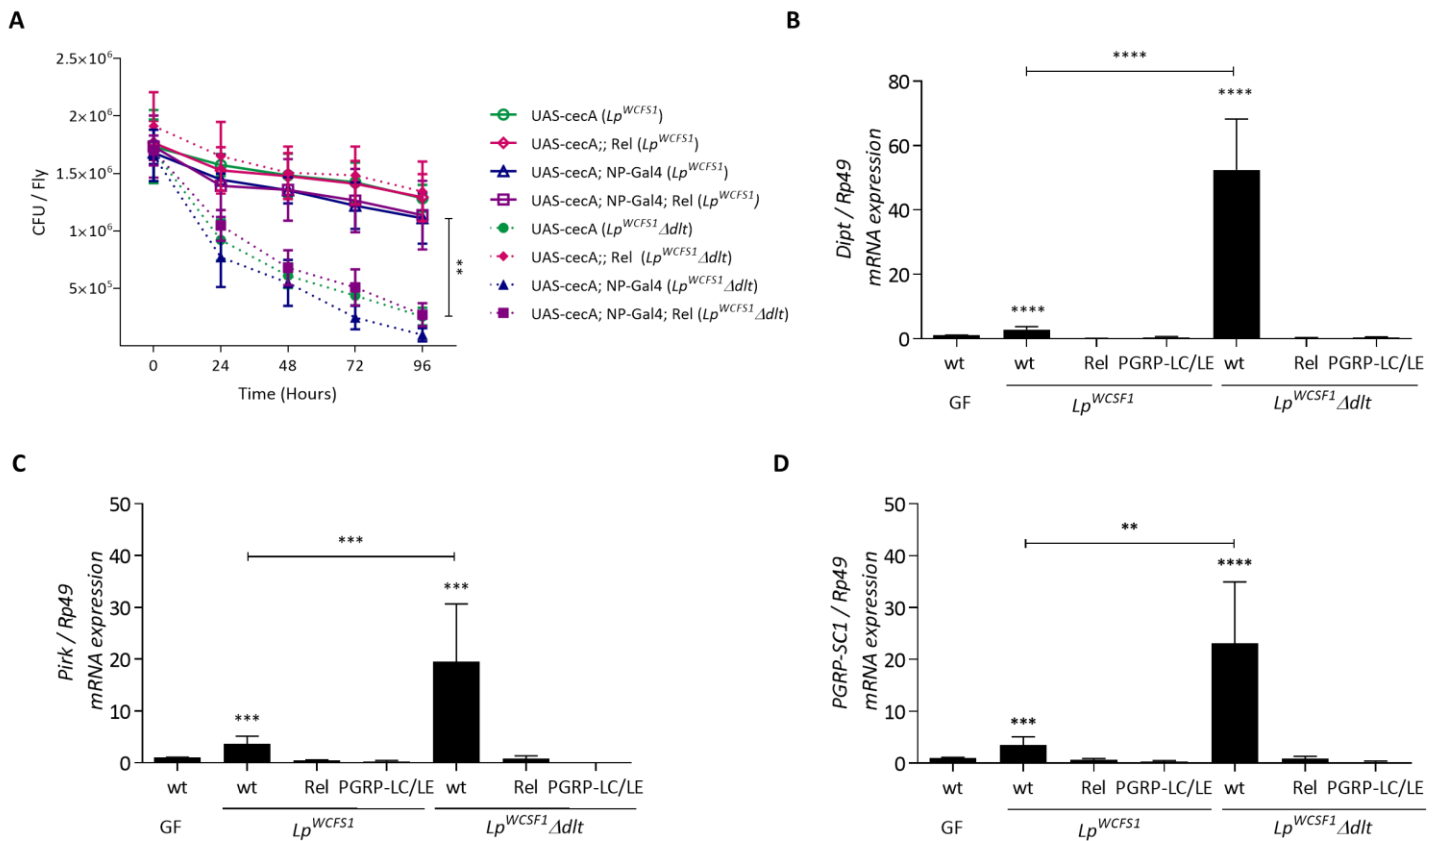

313

314 **Figure 3: The D-alanylation of TAs is essential for the persistence and the immunomodulatory potential of**  
 315 ***Lactobacillus plantarum* in the *Drosophila* gut.**

316 (A) Internal bacterial loads retrieved from the guts of Germ Free (GF) wild-type (wt) or *relish* (Rel) mutant flies fed  
 317 with  $Lp^{WCFS1}$  or  $Lp^{WCFS1} \Delta dlt$  for three days. The expression of a *Cecropin* transgene is specifically driven in the gut  
 318 of these flies by the NP-Gal4 driver. Colony Forming Unit (CFU) counting was performed every 24 hours after  
 319 transferring the monoassociated flies to a fresh cornmeal medium vial.

320 (B, C and D) Relative expression of the *Diptericin* (*Dipt*) (B) *Pirk* (C) and *PGRP-SCI* (D) transcripts in the midgut  
 321 of Germ Free (GF) wild-type (wt), *relish* (Rel) or *PGRP-LC/LE* double mutants flies fed with  $Lp^{WCFS1}$  or  $Lp^{WCFS1} \Delta dlt$   
 322 for 3 days. Transcripts expression was measured by RT-qPCR in total RNA extracts. Ribosomal protein 49 (Rp49)  
 323 transcript was used as reference gene. Transcripts levels detected in GF flies is set as a control.

324 Data obtained from three independent experiments are combined in single value (mean  $\pm$  sd). Statistical tests were  
 325 performed using the Mann-Whitney test within Prism software (ns:  $p > 0.05$ ; \*:  $0.01 < p < 0.05$ ; \*\*:  $0.001 < p < 0.01$ ;  
 326 \*\*\*:  $0.0001 < p < 0.001$ ; \*\*\*\*:  $p < 0.0001$ ). The exact  $p$  values are listed in Figure 3 – source data 1.

327 The following source data and figure supplements are available for figure 3:

328 **Source data 1.** P values for figure 3

329 **Figure supplement 1.**  $Lp^{WCFS1}$  strain shares with  $Lp^{WJL}$  strain the ability to colonize the *Drosophila* gut and to  
 330 induce the IMD pathway.

331 **Figure supplement 2.** Overexpression of *Cecropin A* gene in the gut of adult flies.

332 **Figure supplement 3.** Internal bacterial loads retrieved from the guts of Germ Free (GF) wild-type flies fed with  
 333  $Lp^{WCFS1}$  or  $Lp^{WCFS1} \Delta dlt$  for three days.

334 **Figure supplement 4.** D-alanylation of WTAs are essential for the probiotic effect of  $Lp^{WCFS1}$  in *Drosophila*.

335 **D-alanylation of TAs limits the release of PGN fragments through resistance to**  
336 **antimicrobial effectors**

337 Our findings so far demonstrate a dual property for D-alanylation of TAs in *Bacilli*: first, this  
338 modification of the bacterial surface allows resistance to cationic antimicrobial effectors and  
339 second, it hampers sensing by the IMD pathway thus partially eluding the innate immune  
340 response. Previous studies have established that monomeric and polymeric fragments of PGN  
341 elicit the IMD immune response (Kaneko et al., 2004; Stenbak et al., 2004). Consistently, we  
342 reasoned that the *dlt*-dependent resistance to cationic antimicrobial effectors of *Bt407* and *L.*  
343 *plantarum* would limit any discharge of cell wall PGN thus only triggering a basal IMD  
344 response. To directly examine this possibility, we cultivated wt and *dlt* mutants of *Bt407* and *L.*  
345 *plantarum* bacterial strains in culture medium supplemented or not by chicken egg lysozyme. We  
346 then compared the IMD- induced response in adult flies injected with the supernatant of each of  
347 these microbial cultures. Of note, similarly to AMPs, lysozyme is a cationic antibacterial effector  
348 that drastically affects the growth of the *dlt* mutants in contrast to the highly resistant wt strains  
349 (data not shown). As shown in Figure 4, *Diptericin* expression triggered by the injection of the  
350 supernatants of *Bt407* and *Lp<sup>WCFSI</sup>* did not vary whether these cultures were treated or not with  
351 lysozyme (Figure 4A and 4B). In contrast, *Diptericin* expression significantly increased in flies  
352 injected with the supernatants of *Bt407Δdlt* and *LpWCFSIΔdlt* treated with lysozyme (Figure 4A  
353 and 4B). This response is strictly dependent on the activation of the IMD pathway as it is  
354 reduced in the *relish* mutant. Remarkably, the supernatants of the *dlt* cultures also elicited a  
355 significantly higher *Diptericin* expression as compared to that of wt bacteria. Collectively, our  
356 results suggest an increased discharge of immune-stimulatory PGN moieties in the supernatant of  
357 *dlt* mutants as compared to that of wt cultures.

358 Next, we asked whether the observed variations in the IMD-elicited response are indeed due to  
359 variable concentrations of the PGN fragments and not to any binding constraints related to the  
360 covalent bonding of D-alanylated TAs to the PGN fragments. Therefore, we purified cell wall



361 fractions from the wt and *dlt* mutant bacteria and compared the IMD induced response upon their  
362 injection in adult flies. The extraction procedure was performed according to two different  
363 protocols in order to conserve or to eliminate TAs from the purified PGN fractions (see  
364 Experimental procedures). As shown in Figures 4C and 4D the *Diptericin* expression elicited  
365 upon the injection of cell wall fractions in the adult flies remains invariable whether these  
366 fractions were extracted from wt or *dlt* mutant strains. Moreover, this expression was not altered  
367 whether the TAs were removed from the PGN fractions or not. Interestingly, the elicited immune  
368 response also increased in a dose dependent manner, further supporting a direct correlation  
369 between the dose of bacterial PGN and the extent of the immune response. Thus, altogether,  
370 these data confirm that variations in the IMD-induced response elicited by wt and *dlt* mutants  
371 can be linked to varying doses of discharged PGN fragments.

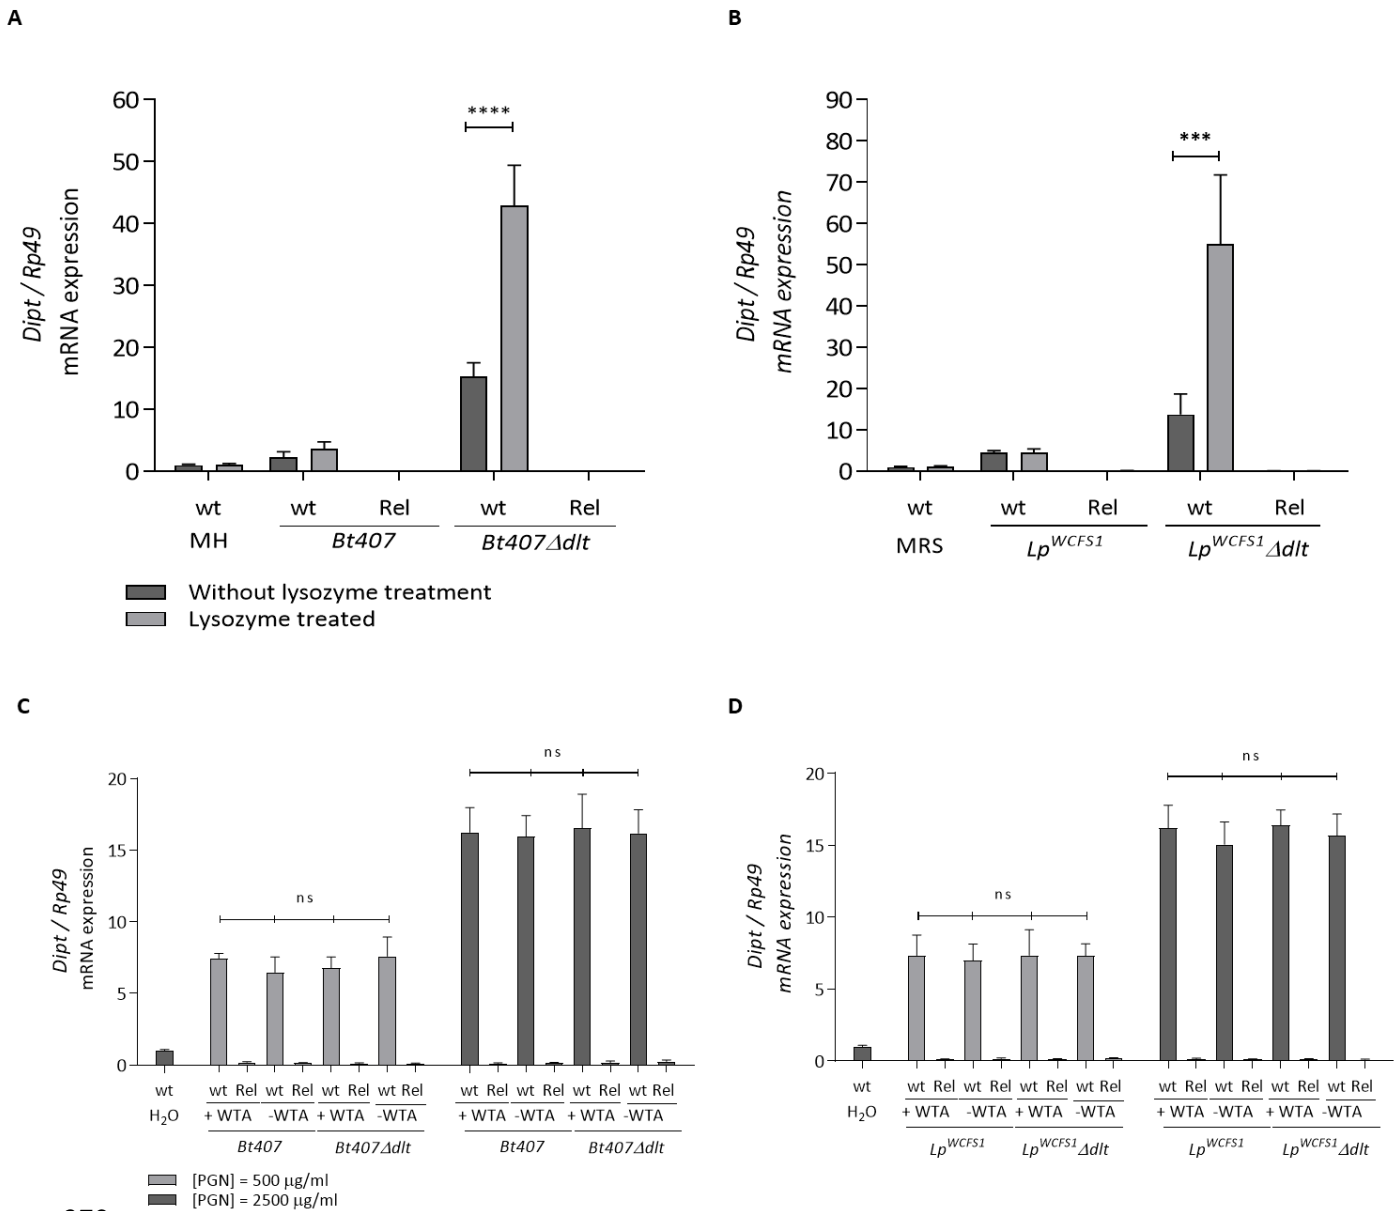

372

373 **Figure 4: D-alanylation of TAs limits the release of PGN fragments from the cell wall of *Bacilli* treated by**  
374 **cationic lysozyme.**

375 (A and B) Wild-type (wt) and *relish* (Rel) mutant flies were injected with the supernatant of *Bt407* and *Lp<sup>WCSF1</sup>*  
376 cultures or their corresponding *dlt* mutants (*Bt407Δdlt* and *Lp<sup>WCSF1</sup>Δdlt*) treated or not by chicken egg lysozyme (10  
377 mg/ml).

378 (C and D) Wild-type (wt) and *relish* (Rel) mutant flies were injected with cell wall peptidoglycan (PGN) fractions  
379 with or without cell wall TAs (500 and 2500 μg/ml) from the wild type or the *dlt* mutants of *Bt407* and *Lp<sup>WCSF1</sup>*.

380 Relative *Diptericin* (*dipt*) expression was measured by RT-qPCR 4 h after the microbial induction of the adult flies.  
381 Ribosomal protein 49 (Rp49) transcript was used as reference gene. Transcripts levels detected in wt flies injected  
382 with MH Broth medium (A), MRS Broth Medium (B) or water (C and D) are set as controls.

383 Data obtained from three independent experiments are combined in single value (mean ± sd). Statistical tests were  
384 performed using the Mann-Whitney test within Prism software (ns:  $p > 0.05$ ; \*:  $0.01 < p < 0.05$ ; \*\*:  $0.001 < p <$   
385  $0.01$ ; \*\*\*:  $0.0001 < p < 0.001$ ; \*\*\*\*:  $p < 0.0001$ ). The exact p values are listed in Figure 4 – source data 1.

386 The following source data is available for figure 4:

387 **Source data 1.** p values for figure 4

388 **The *dlt*- dependent resistance of *Lactobacillus plantarum* to lysozyme is essential for**  
389 **modulating the IMD-dependent immune response in the *Drosophila* gut**

390 Our results suggest that the D-alanylation of TAs mitigates the induction of the *Drosophila* IMD  
391 pathway by *B. thuringiensis* and *L. plantarum*. More precisely, by providing resistance to  
392 cationic antimicrobial effectors, D-alanine esterification of TAs constrains the release of PGN  
393 fragments from the bacterial cell wall. To evaluate the relevance of this model, we asked whether  
394 the depletion of antimicrobial effectors would alleviate the immune response triggered by the *dlt*  
395 mutants *in vivo*. However, as the *Drosophila* genome encodes several AMP genes and that the  
396 concomitant inhibition of their expression is quite difficult, we could not address this question in  
397 the frame of the systemic immune response triggered by a *B. thuringiensis* septic infection in  
398 flies. Therefore, we examined this possibility in the *Drosophila* gut where, in addition to AMPs,  
399 lysozyme constitutes another efficient cationic antimicrobial effector. The role of lysozyme in  
400 the activation of the IMD-response in the gut has not been considered to date. The *Drosophila*  
401 genome comprises seven lysozyme genes of which the members of the LysD family, including  
402 *LysD*, *Lys B*, *Lys C* and *Lys E*, and *LysX*, are expressed in the adult gut (Broderick et al., 2014;  
403 Daffre et al., 1994). As no lysozyme mutants are available, we expressed a dsRNA targeting the  
404 lysozyme transcripts under the control of the gut specific NP-gal4 driver (Hayashi et al., 2002).  
405 Since the lysozyme genes share high sequence similarities, the dsRNA constructs targeting the  
406 *LysS* and *LysX* transcripts also reduced the expression of all *LysD* like genes as off-targets. We  
407 further aggravated this RNAi transcript-depletion by introducing a genetic deficiency uncovering  
408 the lysozyme locus into the genome of the transgenic flies (Figure 5 – figure supplement 1).  
409 Since we could not establish an oral infection of flies with *B. thuringiensis*, we evaluated the role  
410 of gut lysozyme in the modulation of the immune response triggered by the gut resident *L.*  
411 *plantarum*. For that, we quantified *Diptericin* expression level in the guts of GF- RNAi flies  
412 recolonized by either the *Lp*<sup>WCFS1</sup> or the *Lp*<sup>WCFS1</sup>Δ*dlt* mutant strains. As shown in figure 5,

413 compared to control RNAi-GFP flies, the inhibition of lysozyme genes significantly reduced  
414 expression of *Diptericin* in flies mono-associated with  $Lp^{WCFSI}\Delta dlt$  and the level of reduction in  
415 the lysozyme transcripts correlated with the level of reduction in *Diptericin* expression. Of note,  
416 *Diptericin* expression did not vary in RNAi treated flies replenished by  $Lp^{WCFSI}$  whether  
417 lysozyme expression was inhibited or not. These results are in agreement with an increased  
418 discharge of PGN fragments from  $Lp^{WCFSI}\Delta dlt$  as a result of its vulnerability to cationic  
419 antimicrobial effectors *in vivo* and provide a first evidence of the role of lysozyme in modulating  
420 the IMD response in the *Drosophila* gut.

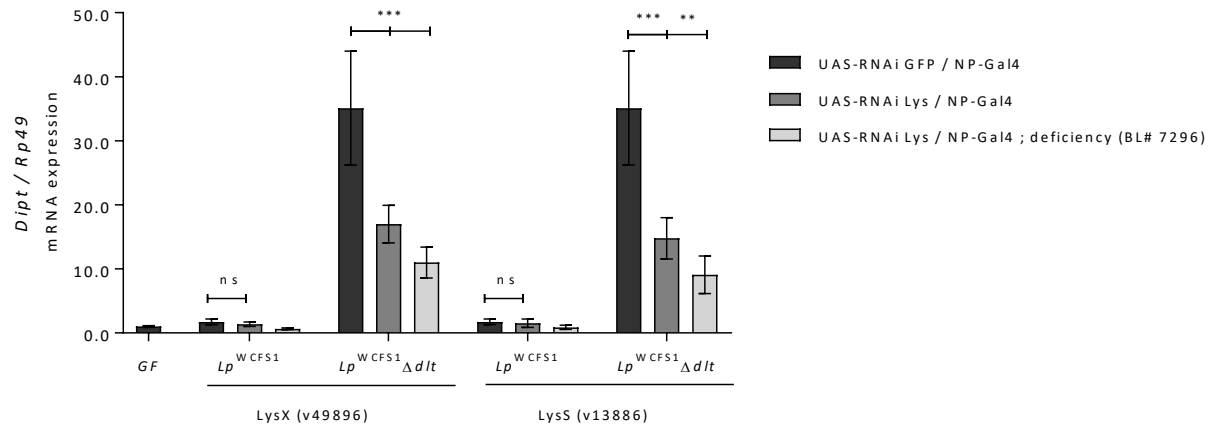

421

422 **Figure 5: The *dlt*-dependent resistance of *Lactobacillus plantarum* to intestinal lysozyme is essential for the**  
 423 **modulation of its ensued IMD- immune response in the gut**

424 Silencing of the lysozyme genes was performed by the expression of RNAi constructs (UAS-RNAi) in the gut of  
 425 adult flies using the midgut specific driver NP-Gal4. Two different transgenic fly lines (v49896) and (v13886) were  
 426 used. These harbor different RNAi construct targeting the *LysX* or the *LysS* transcripts respectively. Silencing of  
 427 *lysozyme* genes is further aggravated by crossing these transgenic flies to a fly line carrying a chromosomal deletion  
 428 (deficiency BL#7296) uncovering the *lysozyme* locus in the *Drosophila* genome. A transgenic line expressing an  
 429 RNAi construct targeting the GFP transcript is used as a control. Relative expression of the *Diptericin* transcript is  
 430 measured in total RNA extracts from the midgut of Germ Free wild-type flies (GF) or the transgenic flies of the  
 431 different genetic background fed on  $Lp^{WCFS1}$  or  $Lp^{WCFS1} \Delta dlt$  for 3 days. Ribosomal protein 49 (Rp49) transcript was  
 432 used as reference gene. Transcripts levels are compared to that detected in in GF flies that is arbitrary set to 1.  
 433 Data obtained from three independent experiments are combined in single value (mean  $\pm$  sd). Statistical tests were  
 434 performed using the Mann-Whitney test within Prism software (ns:  $p > 0.05$ ; \*:  $0.01 < p < 0.05$ ; \*\*:  $0.001 < p < 0.01$ ;  
 435 \*\*\*:  $0.0001 < p < 0.001$ ; \*\*\*\*:  $p < 0.0001$ ). The exact p values are listed in Figure 5 – source data 1.

436 The following source data and figure supplement are available for figure 5:

437 **Source Data 1.** p values for figure 5.

438 **Figure supplement 1.** RNAi silencing of *lysozyme* genes in the gut.

## 439 **Discussion**

440 The role of the *dlt*-operon in mediating resistance to cationic antimicrobial effectors *in vitro* has  
441 been attested for several Gram-positive bacteria species (Fabretti et al., 2006; Kovacs et al.,  
442 2006; Kristian et al., 2005; Perea Velez et al., 2007). This attribute is associated with an  
443 attenuated virulence of the *dlt* mutants for several pathogens including *Listeria monocytogenes*,  
444 *Bacillus anthracis* and *Staphylococcus aureus* (Abachin et al., 2002; Collins et al., 2002; Fisher  
445 et al., 2006; Kristian et al., 2003; Tabuchi et al., 2010). Only for the latter, a role for the *dlt*-  
446 operon in hampering immune sensing and the subsequent activation of the Toll pathway in  
447 *Drosophila* has been proposed (Tabuchi et al., 2010). The Toll pathway is preferentially  
448 triggered upon the sensing of Lys-type PGN by a receptor complex comprising PGRP-SA and  
449 GGBP1, a member of the *Drosophila* Glucan-Binding protein family (Gobert et al., 2003;  
450 Michel, Reichhart, Hoffmann, & Royet, 2001). However, although the exact mechanism  
451 underlying the inhibitory effect of D-alanine esterification of TAs on the Toll pathway activation  
452 remains unknown, the results obtained by Kurokawa *et al.* suggest that it entails the covalent  
453 bonding of D-alanylated Wall TAs to PGN (Kurokawa et al., 2011). This model is challenged by  
454 a report from Atilano *et al.* which indicates that wall TAs limit the access of PGN to the PGRP-  
455 SA receptor independently from the activity of the *dlt*-operon (Atilano, Yates, Glittenberg,  
456 Filipe, & Ligoxygakis, 2011). We show here that, the presence of TAs, whether D-alanylated or  
457 not, does not alter the IMD response upon injection of purified PGN preparations in flies (Figure  
458 4B). Furthermore, the quantification of the IMD response in flies stimulated by injection of  
459 supernatants of bacterial cultures treated or not by chicken egg lysozyme, or increasing  
460 concentration of PGN preparations, reveals a correlation between the induced response and the  
461 doses of injected PGN fragments (Figure 4 A and B). Overall, our data support a model in which  
462 the differential immune response following infection of flies by wt or *dlt* mutant bacteria is  
463 linked to variations in the quantities of released PGN that are made available for sensing by the

464 PGRP-LC/ LE receptors upon lysis by AMPs. The differences between our results and those  
465 documented for Toll pathway activation might be indicative of different ligand binding / receptor  
466 activation mechanisms for the PGRP-LC/ LE and the PGRP-SA/GNBP1 PRR complex.

467 Resistance to antimicrobial effectors and evasion from immune detection are prominent features  
468 of pathogenic bacteria. Interestingly, our data indicate that the D-alanylation of TAs is a common  
469 microbial strategy employed by pathogen and commensal alike to elude and resist immune  
470 defenses thus acquiring the capacity to develop or persist in appropriate niches. Indeed, our  
471 results reveal the essential role of D-alanine esterification in the resistance of *L. plantarum* to the  
472 assault of intestinal cationic lysozyme and thus for its persistence as a core component of the  
473 *Drosophila* microbiota (Figure 3A). These findings are in agreement with a previous report  
474 attesting of the prominence of D-alanine esterification of TAs for the colonization of *L. reuteri* in  
475 the mouse intestinal tract (Perea Velez et al., 2007; Walter et al., 2007). The *dlt* operon was also  
476 found to be an essential element for the establishment of *L. casei* in the gut of the rabbit ligated  
477 ileal loop model (Licandro-Seraut, Scornec, Pedron, Cavin, & Sansonetti, 2014). Our data also  
478 point the crucial role of the D-alanylation of TAs in maintaining the immunomodulatory  
479 potential of *L. plantarum* in the *Drosophila* gut. This cell wall modification allows the fine-  
480 tuning of IMD signaling as to set an essential immune barrier in the gut, which is a prerequisite  
481 for the maintenance of a healthy commensal population. Indeed, several lines of evidence have  
482 indicated the harmful effects of an exacerbated IMD response in the *Drosophila* gut (Bonnay et  
483 al., 2013; Lhocine et al., 2008; Paredes et al., 2011; Ryu et al., 2008). Notably, a dysregulated  
484 IMD response has been associated with commensal dysbiosis and epithelial dysplasia (Guo et al.,  
485 2014; Ryu et al., 2008). These data further highlight the importance of the dual role of D-  
486 alanylation of TAs in the resistance to antimicrobial effectors and the escape of immune  
487 detection as defining characteristics of *L. plantarum* as a *bona fide* beneficial *Drosophila*  
488 commensal. In other words, resistance to antimicrobial effectors allows the persistence of *L.*

489 *plantarum* in the gut and in the habitat of its host. Whereas limiting the discharge of its PGN  
490 immunostimulants, permits the set-up of a steady state immune response that would not perturb  
491 the equilibrium of gut commensals. Remarkably, according to our results, this  
492 immunomodulation capacity of *L. plantarum* largely relies on its *dlt*-dependent resistance to gut  
493 lysozyme (Figure 3B, 3C and 3D). Our genetically based data support the long surmised  
494 immunomodulatory role of lysozyme (Callewaert & Michiels, 2010; Ragland & Criss, 2017).

495 Immunomodulation is as an essential property by which lactic acid bacteria exert their biological  
496 functions in mammals. It is also the main criteria for the selection of probiotic strains (Bron,  
497 Tomita, Mercenier, & Kleerebezem, 2013; I. C. Lee, Tomita, Kleerebezem, & Bron, 2013;  
498 Wells, 2011). Notably, the cytokine profiles triggered upon the sensing of these bacteria in the  
499 intestinal mucosa determine the subsequent polarization of T cells, and thus the orientation of the  
500 ensuing adaptive immune response. Differential cytokine profiles are triggered upon the sensing  
501 of appropriate Microbial Associated Molecular Patterns (MAMPs) of *lactobacilli* by cognate  
502 PRRs at the intestinal epithelial barrier (Lebeer, Vanderleyden, & De Keersmaecker, 2010).  
503 Notably, previous data have suggested that the sensing of lipoteichoic acid (LTA) is mainly  
504 performed by the transmembrane TLR2 receptor, whereas sensing of bacterial PGN fragments is  
505 preferentially mediated by intracellular NOD receptors (Macho Fernandez, Pot, & Grangette,  
506 2011; Smelt et al., 2013; Travassos et al., 2004). Interestingly, the wt and the *dlt*-mutant of the  
507 *Lp<sup>WCFSI</sup>* strain triggered a differential cytokine profiles in mammals (Grangette et al., 2005;  
508 Smelt et al., 2013). The transcriptional response triggered by the former is marked by the  
509 expression of TLR2-dependent pro-inflammatory IL-12 whereas that activated by the latter is  
510 characterized by an enhanced expression of anti-inflammatory IL-10 that is mainly NOD-  
511 dependent (Grangette et al., 2005; Macho Fernandez, Pot, et al., 2011; Macho Fernandez,  
512 Valenti, et al., 2011). Similar results were obtained with a wt and *dlt*-mutant strain of *L.*  
513 *rhamnosus GG* (Claes et al., 2010). Accordingly, the *dlt* mutants alleviated the inflammatory



514 response in a mouse colitis model (Claes et al., 2010; Grangette et al., 2005). Despite the  
515 complexity of the immune response in the mammalian intestinal mucosa, these data are  
516 reminiscent of our results reporting a differential immune response triggered by the wt and the  
517 *Lp*<sup>WCFS1Δ*dlt*</sup>. Interestingly, a recent study from Bosco-Drayon and colleagues emphasized the  
518 prominent role of the intracellular PGRP-LE receptor as a master sensor of small fragments of  
519 PGN (tracheal cytotoxin) in the *Drosophila* gut further underlying the similarity between the  
520 function of this receptor and that of mammalian NODs (Bosco-Drayon et al., 2012). Given the  
521 sensitivity of the *dlt* mutants of *Lactobacilli* to antimicrobial effectors (Perea Velez et al., 2007;  
522 Walter et al., 2007) and the high occurrence of lysozyme and AMPs at the mammalian intestinal  
523 barrier, it is tempting to speculate that a similar mechanism might apply for the regulation of  
524 PGN-sensing and the modulation of innate immune responses by commensal and probiotic  
525 *Lactobacilli* species in *Drosophila* and mammals (Lebeer et al., 2010; Perea Velez et al., 2007).

526 Several reports have demonstrated the potential of *L. plantarum* to impact *Drosophila*  
527 development and physiology (Blum et al., 2013; Bosco-Drayon et al., 2012; Broderick et al.,  
528 2014; Erkosar & Leulier, 2014; Guo et al., 2014; Jones et al., 2013; Matos et al., 2017; Ryu et  
529 al., 2008; Sharon et al., 2010; Storelli et al., 2011; A. C. Wong et al., 2014). Notably, work from  
530 Leulier's laboratory revealed the importance of this bacterium in promoting juvenile growth  
531 during chronic undernutrition (Storelli et al., 2011). Interestingly, Matos *et al.* showed that a  
532 functional *dlt*-operon is required for this biological function of *L. plantarum* (Matos et al., 2017).

533 Our data give further evidence of the importance of the *dlt*-dependant D-alanylation of TAs for  
534 the beneficial impacts of *L. plantarum* on its host biology in particular by tuning the sensing of  
535 PGN immunostimulants, thus establishing an *ad hoc* balanced immune response at the intestinal  
536 epithelium. Moreover, in *Drosophila* as in mammals, *L. plantarum* was shown to exert protective  
537 probiotic effects. Notably, in a recent study, Blum *et al.* provided evidence of a protective role of  
538 *L. plantarum* against intestinal pathogens such as *Serratia marcescens*. In this context,

539 complementation of fly food by *L. plantarum* significantly enhanced the capacity of CR and GF  
540 flies to survive an infection by *S. marcescens* (Blum et al., 2013). Interestingly, we showed that  
541 this probiotic effect of *L. plantarum* feeding in *Drosophila* is strictly dependent on the activity of  
542 its *dlt* operon as evidenced by the phenotype of flies fed by the *Lp<sup>WCFSIΔdlt</sup>* mutant strain (Figure  
543 3 – figure supplement 4). These data are in line with a recent comprehensive study performed by  
544 Smelt *et al.*, which demonstrated that the majority of the immunomodulatory effects induced by  
545 the probiotic *Lp<sup>WCFSI</sup>* strain in mice are dependent on the activity of its *dlt*-operon (Smelt et al.,  
546 2013).

547 To summarize, our results put forward the pivotal role of the D-alanine esterification of TAs in  
548 modulating the sensing of bacterial PGN by the host immune system by preventing antimicrobial  
549 effectors mediated bacterial lysis. Modification of bacterial PGN was previously reported as an  
550 immune evasion strategy of pathogens to prevent its degradation by lysozyme and thus the  
551 release of immunostimulatory fragments (Boneca et al., 2007; Wolfert, Roychowdhury, &  
552 Boons, 2007). The function of the *dlt*-operon is unique in the sense that the modification of a  
553 cell-wall component, namely TAs, interferes with the sensing of another component, which is  
554 PGN, by the host innate immune sensors. Although the *dlt* operon is highly conserved among  
555 Gram-positive species, including saprophytic bacteria, such as the harmless and non-pathogenic  
556 *B. subtilis*, our results provide a clear evidence that its function is crucial for the success of  
557 pathogenic and commensal species in resisting host innate immune defenses. Given the high  
558 conservation of the innate immune system and the prevalence of TAs and PGN as central  
559 modulators of host defenses, these findings might yield new insights into the pathogenesis and  
560 the probiotic effects of bacterial species and potentially orient the development of therapeutic  
561 and prophylactic interventions.

## 562 **Materials and Methods**

### 563 **Bacterial strains and growth conditions**

564 The *dlt* operon mutant of *B. thuringiensis* was generated from the strain *B. thuringiensis* 407 cry-  
565 strain (*Bt407*) (Lereclus, Arantes, Chaufaux, & Lecadet, 1989) as described in (Abi Khattar et  
566 al., 2009). Briefly, the demethylated pMAD-updlt-aphA3Km-downdlt plasmid (Abi Khattar et  
567 al., 2009) was prepared from *Escherichia coli* ET12567 and introduced, by electroporation, into  
568 *Bt407*. The *dltXABCD* genes were replaced with the kanamycin (km) resistant cassette by allelic  
569 exchange. Clones resistant to Km and susceptible to Erythromycin (Em) were examined by PCR,  
570 and the homologous recombination was verified by sequencing.

571 The *dltA* mutant of *B. subtilis* was constructed in strain 168 as follows: an internal fragment of  
572 the *dltA* gene was amplified with primers BSdltA-*EcoRI* (5'-ggaattcctcggccagcagattcagacagttt-  
573 3') and BSdltA-*BamHI* (5'-accgggatccatcaggcacatttg-3'). The PCR product and the integrative  
574 plasmid pDIA5307 (PMID: 8113162) were digested with *EcoRI* and *BamHI* and ligated together  
575 generating pDA5307-BSdltA. The ligated product was digested with *SmaI* to linearize any  
576 pDIA5307 plasmid left, transformed into competent cells of strain 168 and selected on  
577 chloramphenicol (4 µg/ml). Clones were validated by PCR and 4 independent clones were stored  
578 generating strain 168  $\Delta dltA$ . Clone 1 was used in this work.

579 *Serratia marcescens* Db11 (Nehme et al., 2007) and *E. coli* DH5 $\alpha$ GFP (Bonnay et al., 2013) are  
580 a kind gift from Dr. Dominique Ferrandon and Pr. Jean Marc Reichhart (UPR9022 – CNRS -  
581 Université de Strasbourg) and *L. plantarum* WCFS1 (*Lp<sup>WCFS1</sup>*) (Kleerebezem et al., 2003) and its  
582  $\Delta dlt$  mutant (*Lp<sup>WCFS1</sup>  $\Delta dlt$* ) (Palumbo et al., 2006) from Pr. Pascal Hols (Unité de Génétique,  
583 Institut des Sciences de la Vie, Université catholique de Louvain, B-1348 Louvain-La-Neuve,  
584 Belgium). All bacterial strains, except *L. plantarum*, were cultured on Luria-Bertani medium

585 (LB) at 37°C and 30°C for *B. thuringiensis*. *L. plantarum* was cultured on Man, Rogosa and  
586 Sharpe (MRS) medium at 37°C.

587 Heat killing of bacteria was performed as described (El Chamy, Leclerc, Caldelari, & Reichhart,  
588 2008) Briefly, bacterial solutions followed two steps of 20 minutes of incubation at 95°C  
589 separated by 20 minutes of cooling on ice. Killing was verified by plating 100 µl of each  
590 bacterial solution on LB agar plates.

591 For the preparation of the supernatant of bacterial cultures treated with Lysozyme, chicken egg  
592 white lysozyme (10mg/ml) was applied to bacterial cultures of *Lp<sup>WCFSI</sup>*, *Lp<sup>WCFSI</sup>Δdlt*, *Bt407* and  
593 *Bt407Δdlt* at an optical density of 0.5 at  $\lambda = 600$  nm ( $OD_{600} = 0.5$ ) in Muller Hinton (MH) and  
594 MRS mediums respectively. When the  $OD_{600}$  reached 2, the bacterial cultures were centrifuged,  
595 and supernatants were heated at 95°C for 20 minutes before injection in the flies.

#### 596 **Quantification of D-Alanine from TAs and purification of bacterial cell wall fractions**

597 Quantification of D-Ala esterified to TAs was performed by HPLC as described previously  
598 (Kamar et al., 2017) , after release by alkaline hydrolysis of whole cells or cell wall fractions.

599 Cell walls were prepared from *Lp<sup>WCFSI</sup>*, *Lp<sup>WCFSI</sup>Δdlt*, *Bt407* and *Bt407Δdlt* as described (Bernard  
600 et al., 2011). SDS, Pronase (2 mg/ml), Trypsin (200 µg/ml), DNase (50 µg/ml) and RNase (50  
601 µg/ml) treatments were applied to obtain cell walls containing peptidoglycan and covalently  
602 attached glycopolymers (WTA, polysaccharides). All incubations were performed at  $pH \leq 6.0$ , to  
603 keep D-Ala esterified on WTAs. The presence of D-Ala in the purified cell walls was checked by  
604 HPLC as described above.

605 Purified peptidoglycan was obtained after incubation of cell walls in 48% hydrofluoric acid at  
606 4°C for 16 hours, to remove WTA and other polysaccharides attached covalently to  
607 peptidoglycan.

608 ***Drosophila melanogaster* stocks and maintenance**

609 Oregon-R is used as wild-type. The IMD pathway mutants Relish<sup>E20</sup> (*Rel*), *PGRP-LC*<sup>ΔE12</sup>  
610 (*PGRP-LC*) and the *PGRP-LC/LE* double mutant combines the *PGRP-LC*<sup>ΔE12</sup> and the *PGRP-*  
611 *LE*<sup>E112</sup> mutations were been described (Gottar et al., 2002; Hedengren et al., 1999; Takehana et  
612 al., 2004). The UAS-Cecropin A (UAS-Cec) (Reichhart et al., 2002) is a kind gift from Pr. Jean  
613 Marc Reichhart (UPR9022 – CNRS - Université de Strasbourg). Flies carrying an UAS-RNAi  
614 against *Lysozyme S* (v13386 GD), *Lysozyme X* (v49896 GD) were obtained from the Vienna  
615 *Drosophila* RNAi Center (<http://stockcenter.vdrc.at/control/main>). UAS-RNAi GFP line (397-  
616 05) were obtained from the *Drosophila* Genetic Resource Center (Kyoto, Japan; [http://](http://www.dgrc.kit.ac.jp/index.html)  
617 [www.dgrc.kit.ac.jp/index.html](http://www.dgrc.kit.ac.jp/index.html)). The deficiency Df(3L)10F125/TM6B,Tb (BL# 7296) and the fat  
618 body driver c564-Gal4 (BL# 6982) are from the Bloomington Stock Center. The adult gut tissues  
619 driver NP3080- Gal4 (NP-Gal4) was obtained from the *Drosophila* Genetic Resource at the  
620 National Institute of Genetics (Shizuoka, Japan). The Gal4 system activation was performed by  
621 incubating 2-3 days old flies for six further days at 29 °C. Fly stocks were raised at 25°C on  
622 cornmeal-agar medium rich in yeast (7.25%). For antibiotic treatment the medium was  
623 supplemented with a mixture of Ampicillin, Kanamycin, Tetracyclin and Erythromycin at 50  
624 ug/ml each (final concentration). Adult female flies, aged between 0 to 1 day old, were fed on  
625 this mixture for 3 days. Germ free status was checked by plating adult fly gut on MRS and LB  
626 agar mediums.

627 **Infections and survival experiments**

628 Survival experiment were performed on a total of  $\geq 45$  adult females per genotype (15 to 20  
629 individuals per each of the three biological replicates). Batches of 15 to 20 female flies, aged  
630 between 2 to 4 days old, were pricked with a tungsten needle previously dipped into a bacterial  
631 solution prepared from an overnight culture that was washed and diluted in PBS (1x) to a final  
632 OD<sub>600</sub> = 2. The infected flies were incubated at 29 °C and survival were counted were counted

633 15, 21 and 25 hours post infection. The *Diptericin* expression was measured by RT-qPCR 4h  
634 post infection.

635 Oral infection of flies by *S. marcescens* was performed as described (Nehme et al., 2007). In  
636 brief, an overnight bacterial culture was centrifuged and diluted to a final OD<sub>600</sub> = 1 in a 50mM  
637 sucrose solution. The challenged flies were incubated on 29 °C for 54 h and the *Diptericin*  
638 expression was quantified in RNA extracts of 5 to 10 dissected guts by RT-qPCR.

639 9.2nl of sonicated purified peptidoglycan or 69 nl of supernatant treated with lysozyme were  
640 injected with into the thorax of batches of 20 to 25 female flies (aged 2 to 4 days old) with a  
641 Nanoject apparatus (Drummond, Broomall, PA). These flies were incubated 4 hours at 29 °C  
642 then *Diptericin* expression was quantified in RNA extracts by RT-qPCR.

#### 643 **Fly internal bacterial load quantification**

644 The CFU counting was performed on 30 adult females or 15 to 30 midguts per genotype (10  
645 adults or 5 to 10 midguts per each of the three biological replicates) by plating serial dilutions of  
646 lysates obtained from infected flies or midguts on LB or MRS mediums containing the  
647 appropriate antibiotic to each strain. Each biological sample was analyzed by two technical  
648 replicates per experiment.

#### 649 **Monoassociation of germ-free flies**

650 Germ free female flies were transferred to a new food fly medium covered with 150 µl of  
651 bacterial solution prepared from an overnight culture of *Lp*<sup>WCFS1</sup> or *Lp*<sup>WCFS1</sup>  $\Delta$ *dlt* washed and  
652 diluted in MRS to a final OD<sub>600</sub> = 1. *Diptericin*, *pirk*, *PGRP-SC1* expressions were quantified by  
653 RT-qPCR from RNA extracts of 5 to 10 dissected guts from flies fed 3 days on *L. plantarum*  
654 feeding.

## 655 **Maintenance of *L. plantarum* in *Drosophila*'s gut**

656 Batches of 20 Germ free flies were fed *Lp*<sup>WCFSI</sup> or *Lp*<sup>WCFSI</sup> $\Delta$ *dlt* for 3 days and then transferred to  
657 a fresh cornmeal medium vial. Every 24 hours, 5 to 10 guts were dissected and plated on MRS  
658 Medium containing the appropriate antibiotic to each strain.

## 659 **Quantification of gene expression**

660 Total RNA was extracted with TRI Reagent (Sigma – Aldrich) from 15 to 25 adult females or 5  
661 to 10 dissected adult female guts of each genotype per biological replicate. The reverse  
662 transcription was performed on 1  $\mu$ g of RNA by using the RevertAid RT Reverse Transcription  
663 Kit (Thermo Fisher Scientific). cDNA was used as template in PCR reaction with three 10  $\mu$ l  
664 technical replicates of each biological sample. qPCR was performed on an iQ5 Real Time PCR  
665 detection system (Biorad) using iTaq Universal Syber Green supermix (Biorad). The amount of  
666 RNA detected was normalized to that of the house keeping gene *rp49*. Primers for *Diptericin*,  
667 *Attacin D*, *pirk*, *PGRP-SC1*, *rp49* and *lysozymes* genes are listed in the supplementary file 1.  
668 Relative gene expression levels between control and experimental samples was determined using  
669 the  $\Delta\Delta$ CT method. Each experimental sample was compared to each wild-type sample.

## 670 **Statistical analysis**

671 Statistical analysis was performed using GraphPad Prism 7.0b software ( $\alpha = 0.05$ ) and statistical  
672 tests used for each data set are indicated in figure legends.

## 673 **Acknowledgments**

674 We thank Pr. Jean-Marc Reichhart and Dr. Dominique Ferrandon for critical reading of the  
675 manuscript. We thank Pr. Pascals Hols for providing the *Lp*<sup>WCFSI</sup> strain and its  $\Delta$ *dlt* mutant. This  
676 work was funded by the Research Council of the Saint-Joseph University of Beirut (FS73) and  
677 the Lebanese National Council of Scientific Research (CNRS-L/ 02-05-16) and has benefited  
678 from the support of the CEDRE program (32942VD) and Institut National de la Recherche

679 Agronomique (INRA). Zaynoun Attieh is supported by a PhD fellowship from the CNRS-L and  
680 has also benefited from the SAFAR program and an international mobility scholarship from  
681 AgroParisTech (Bourse de mobilité Abies). *B. subtilis* $\Delta$ *dlt* mutant was constructed in the frame  
682 of a European Research Council starting grant (PGNfromSHAPEtoVIR n°202283) awarded to  
683 Ivo G. Boneca.

## 684 **Additional information**

### 685 **Competing interests**

686 The authors declare that no competing interests exist.

## 687 **Figures Supplements**

### 688 **Figure 1:**

689 **Figure supplement 1.** Overexpression of *CecropinA* gene.

690 **Figure supplement 2.** Amounts of D-alanine released from whole cells by alkaline hydrolysis  
691 for the wild type and the *dlt* mutant strains of *Bt407*.

692 **Figure supplement 3.** Complementation of the *Bt407* $\Delta$ *dltX* mutant with the *dltX-ORF*  
693 (*Bt407* $\Delta$ *dlt* $\Omega$ *dltX*) completely restores its virulence similarly to the wt *Bt407* strain.

### 694 **Figure 3:**

695 **Figure supplement 1.** *Lp*<sup>WCFSI</sup> strain shares with *Lp*<sup>WJL</sup> strain the ability to colonize the  
696 *Drosophila* gut and to induce the IMD pathway.

697 **Figure supplement 2.** Overexpression of *Cecropin A* gene in the gut of adult flies.

698 **Figure supplement 3.** Internal bacterial loads retrieved from the guts of Germ Free (GF) wild-  
699 type flies fed with *Lp*<sup>WCFSI</sup> or *Lp*<sup>WCFSI</sup> $\Delta$ *dlt* for three days.

700 **Figure supplement 4.** D-alanylation of WTAs are essential for the probiotic effect of *Lp*<sup>WCFSI</sup> in  
701 *Drosophila*.



702 **Figure 5:**

703 **Figure supplement 1.** RNAi silencing of *lysozyme* genes in the gut.

## 704 **Sources Data**

705 **Figure 1 – source Data 1.** p values for figure 1.

706 **Figure 2 – source Data 1.** p values for figure 2.

707 **Figure 3 – source Data 1.** p values for figure 3.

708 **Figure 4 – source Data 1.** p values for figure 4.

709 **Figure 5 – source Data 1.** p values for figure 5.

## 710 **Additional files**

### 711 **Supplementary files**

712 Supplementary file 1. List of primers used for the RT-qPCR reaction.

## 713 **References**

- 714 Abachin, E., Poyart, C., Pellegrini, E., Milohanic, E., Fiedler, F., Berche, P., & Trieu-Cuot, P.  
715 (2002). Formation of d-alanyl-lipoteichoic acid is required for adhesion and virulence of listeria  
716 monocytogenes. *Mol Microbiol*, *43*(1), 1-14.
- 717 Abi Khattar, Z., Rejasse, A., Destoumieux-Garzon, D., Escoubas, J. M., Sanchis, V., Lereclus,  
718 D., . . . Gaudriault, S. (2009). The dlt operon of bacillus cereus is required for resistance to  
719 cationic antimicrobial peptides and for virulence in insects. *J Bacteriol*, *191*(22), 7063-7073.  
720 doi:10.1128/JB.00892-09
- 721 Aggarwal, K., Rus, F., Vriesema-Magnuson, C., Erturk-Hasdemir, D., Paquette, N., &  
722 Silverman, N. (2008). Rudra interrupts receptor signaling complexes to negatively regulate the  
723 imd pathway. *PLoS Pathog*, *4*(8), e1000120. doi:10.1371/journal.ppat.1000120
- 724 Aggarwal, K., & Silverman, N. (2008). Positive and negative regulation of the drosophila  
725 immune response. *BMB Rep*, *41*(4), 267-277.
- 726 Anaya-Lopez, J. L., Lopez-Meza, J. E., & Ochoa-Zarzosa, A. (2013). Bacterial resistance to  
727 cationic antimicrobial peptides. *Crit Rev Microbiol*, *39*(2), 180-195.  
728 doi:10.3109/1040841X.2012.699025
- 729 Atilano, M. L., Yates, J., Glittenberg, M., Filipe, S. R., & Ligoxygakis, P. (2011). Wall teichoic  
730 acids of staphylococcus aureus limit recognition by the drosophila peptidoglycan recognition  
731 protein-sa to promote pathogenicity. *PLoS Pathog*, *7*(12), e1002421.  
732 doi:10.1371/journal.ppat.1002421
- 733 Bechinger, B., & Gorr, S. U. (2017). Antimicrobial peptides: Mechanisms of action and  
734 resistance. *J Dent Res*, *96*(3), 254-260. doi:10.1177/0022034516679973
- 735 Bernard, E., Rolain, T., Courtin, P., Guillot, A., Langella, P., Hols, P., & Chapot-Chartier, M. P.  
736 (2011). Characterization of o-acetylation of n-acetylglucosamine: A novel structural variation of  
737 bacterial peptidoglycan. *J Biol Chem*, *286*(27), 23950-23958. doi:10.1074/jbc.M111.241414
- 738 Bischoff, V., Vignal, C., Duvic, B., Boneca, I. G., Hoffmann, J. A., & Royet, J. (2006).  
739 Downregulation of the drosophila immune response by peptidoglycan-recognition proteins sc1  
740 and sc2. *PLoS Pathog*, *2*(2), e14.
- 741 Blum, J. E., Fischer, C. N., Miles, J., & Handelsman, J. (2013). Frequent replenishment sustains  
742 the beneficial microbiome of drosophila melanogaster. *MBio*, *4*(6), e00860-00813.  
743 doi:10.1128/mBio.00860-13
- 744 Boneca, I. G., Dussurget, O., Cabanes, D., Nahori, M. A., Sousa, S., Lecuit, M., . . . Girardin, S.  
745 E. (2007). A critical role for peptidoglycan n-deacetylation in listeria evasion from the host  
746 innate immune system. *Proc Natl Acad Sci U S A*, *104*(3), 997-1002.  
747 doi:10.1073/pnas.0609672104
- 748 Bonnay, F., Cohen-Berros, E., Hoffmann, M., Kim, S. Y., Boulianne, G. L., Hoffmann, J. A., . . .  
749 Reichhart, J. M. (2013). Big bang gene modulates gut immune tolerance in drosophila. *Proc Natl*  
750 *Acad Sci U S A*, *110*(8), 2957-2962. doi:1221910110 [pii] 10.1073/pnas.1221910110
- 751 Bosco-Drayon, V., Poidevin, M., Boneca, I. G., Narbonne-Reveau, K., Royet, J., & Charroux, B.  
752 (2012). Peptidoglycan sensing by the receptor pgrp-le in the drosophila gut induces immune

- 753 responses to infectious bacteria and tolerance to microbiota. *Cell Host Microbe*, *12*(2), 153-165.  
754 doi:S1931-3128(12)00228-4 [pii] 10.1016/j.chom.2012.06.002
- 755 Broderick, N. A., Buchon, N., & Lemaitre, B. (2014). Microbiota-induced changes in drosophila  
756 melanogaster host gene expression and gut morphology. *MBio*, *5*(3), e01117-01114.  
757 doi:10.1128/mBio.01117-14
- 758 Bron, P. A., Tomita, S., Mercenier, A., & Kleerebezem, M. (2013). Cell surface-associated  
759 compounds of probiotic lactobacilli sustain the strain-specificity dogma. *Curr Opin Microbiol*,  
760 *16*(3), 262-269. doi:10.1016/j.mib.2013.06.001
- 761 Brown, S., Santa Maria, J. P., Jr., & Walker, S. (2013). Wall teichoic acids of gram-positive  
762 bacteria. *Annu Rev Microbiol*, *67*, 313-336. doi:10.1146/annurev-micro-092412-155620
- 763 Buchon, N., Broderick, N. A., Chakrabarti, S., & Lemaitre, B. (2009). Invasive and indigenous  
764 microbiota impact intestinal stem cell activity through multiple pathways in drosophila. *Genes*  
765 *Dev*, *23*(19), 2333-2344. doi:23/19/2333 [pii] 10.1101/gad.1827009
- 766 Buchon, N., Broderick, N. A., & Lemaitre, B. (2013). Gut homeostasis in a microbial world:  
767 Insights from drosophila melanogaster. *Nat Rev Microbiol*, *11*(9), 615-626. doi:nrmicro3074  
768 [pii] 10.1038/nrmicro3074
- 769 Callewaert, L., & Michiels, C. W. (2010). Lysozymes in the animal kingdom. *J Biosci*, *35*(1),  
770 127-160.
- 771 Chandler, J. A., Lang, J. M., Bhatnagar, S., Eisen, J. A., & Kopp, A. (2011). Bacterial  
772 communities of diverse drosophila species: Ecological context of a host-microbe model system.  
773 *PLoS Genet*, *7*(9), e1002272. doi:10.1371/journal.pgen.1002272 PGENETICS-D-11-00559 [pii]
- 774 Chang, C. I., Chelliah, Y., Borek, D., Mengin-Lecreulx, D., & Deisenhofer, J. (2006). Structure  
775 of tracheal cytotoxin in complex with a heterodimeric pattern-recognition receptor. *Science*,  
776 *311*(5768), 1761-1764.
- 777 Chang, C. I., Ihara, K., Chelliah, Y., Mengin-Lecreulx, D., Wakatsuki, S., & Deisenhofer, J.  
778 (2005). Structure of the ectodomain of drosophila peptidoglycan-recognition protein lca suggests  
779 a molecular mechanism for pattern recognition. *Proc Natl Acad Sci U S A*, *102*(29), 10279-  
780 10284.
- 781 Choe, K. M., Lee, H., & Anderson, K. V. (2005). Drosophila peptidoglycan recognition protein  
782 lc (pgrp-lc) acts as a signal-transducing innate immune receptor. *Proc Natl Acad Sci U S A*,  
783 *102*(4), 1122-1126.
- 784 Choe, K. M., Werner, T., Stoven, S., Hultmark, D., & Anderson, K. V. (2002). Requirement for  
785 a peptidoglycan recognition protein (pgrp) in relish activation and antibacterial immune  
786 responses in drosophila. *Science*, *296*(5566), 359-362. doi:10.1126/science.1070216 1070216  
787 [pii]
- 788 Claes, I. J., Lebeer, S., Shen, C., Verhoeven, T. L., Dilissen, E., De Hertogh, G., . . . De  
789 Keersmaecker, S. C. (2010). Impact of lipoteichoic acid modification on the performance of the  
790 probiotic lactobacillus rhamnosus gg in experimental colitis. *Clin Exp Immunol*, *162*(2), 306-  
791 314. doi:10.1111/j.1365-2249.2010.04228.x
- 792 Collins, L. V., Kristian, S. A., Weidenmaier, C., Faigle, M., Van Kessel, K. P., Van Strijp, J. A.,  
793 . . . Peschel, A. (2002). Staphylococcus aureus strains lacking d-alanine modifications of teichoic

- 794 acids are highly susceptible to human neutrophil killing and are virulence attenuated in mice. *J*  
795 *Infect Dis*, 186(2), 214-219. doi:10.1086/341454
- 796 Corby-Harris, V., Pontaroli, A. C., Shimkets, L. J., Bennetzen, J. L., Habel, K. E., & Promislow,  
797 D. E. (2007). Geographical distribution and diversity of bacteria associated with natural  
798 populations of drosophila melanogaster. *Appl Environ Microbiol*, 73(11), 3470-3479.  
799 doi:AEM.02120-06 [pii] 10.1128/AEM.02120-06
- 800 Cox, C. R., & Gilmore, M. S. (2007). Native microbial colonization of drosophila melanogaster  
801 and its use as a model of enterococcus faecalis pathogenesis. *Infect Immun*, 75(4), 1565-1576.  
802 doi:IAI.01496-06 [pii] 10.1128/IAI.01496-06
- 803 Daffre, S., Kylsten, P., Samakovlis, C., & Hultmark, D. (1994). The lysozyme locus in  
804 drosophila melanogaster: An expanded gene family adapted for expression in the digestive tract.  
805 *Mol Gen Genet*, 242(2), 152-162.
- 806 Debabov, D. V., Heaton, M. P., Zhang, Q., Stewart, K. D., Lambalot, R. H., & Neuhaus, F. C.  
807 (1996). The d-alanyl carrier protein in lactobacillus casei: Cloning, sequencing, and expression  
808 of dlta. *J Bacteriol*, 178(13), 3869-3876.
- 809 Debabov, D. V., Kiriukhin, M. Y., & Neuhaus, F. C. (2000). Biosynthesis of lipoteichoic acid in  
810 lactobacillus rhamnosus: Role of dltd in d-alanylation. *J Bacteriol*, 182(10), 2855-2864.
- 811 Dommett, R., Zilbauer, M., George, J. T., & Bajaj-Elliott, M. (2005). Innate immune defence in  
812 the human gastrointestinal tract. *Mol Immunol*, 42(8), 903-912.  
813 doi:10.1016/j.molimm.2004.12.004
- 814 Dushay, M. S., Asling, B., & Hultmark, D. (1996). Origins of immunity: *Relish*, a compound rel-  
815 like gene in the antibacterial defense of drosophila. *Proc. Natl. Acad. Sci. (USA)*, 93(19), 10343-  
816 10347.
- 817 El Chamy, L., Leclerc, V., Caldelari, I., & Reichhart, J. M. (2008). Sensing of 'danger signals'  
818 and pathogen-associated molecular patterns defines binary signaling pathways 'upstream' of toll.  
819 *Nat Immunol*, 9(10), 1165-1170. doi:10.1038/ni.1643
- 820 El Chamy, L., Matt, N., Ntwasa, M., & Reichhart, J. M. (2015). The multilayered innate immune  
821 defense of the gut. *Biomed J*, 38(4), 276-284. doi:10.4103/2319-4170.158621
- 822 Erkosar, B., & Leulier, F. (2014). Transient adult microbiota, gut homeostasis and longevity:  
823 Novel insights from the drosophila model. *FEBS Lett*, 588(22), 4250-4257.  
824 doi:10.1016/j.febslet.2014.06.041
- 825 Fabretti, F., Theilacker, C., Baldassarri, L., Kaczynski, Z., Kropec, A., Holst, O., & Huebner, J.  
826 (2006). Alanine esters of enterococcal lipoteichoic acid play a role in biofilm formation and  
827 resistance to antimicrobial peptides. *Infect Immun*, 74(7), 4164-4171. doi:10.1128/IAI.00111-06
- 828 Ferrandon, D. (2013). The complementary facets of epithelial host defenses in the genetic model  
829 organism drosophila melanogaster: From resistance to resilience. *Curr Opin Immunol*, 25(1), 59-  
830 70. doi:10.1016/j.coi.2012.11.008
- 831 Ferrandon, D., Imler, J. L., Hetru, C., & Hoffmann, J. A. (2007). The drosophila systemic  
832 immune response: Sensing and signalling during bacterial and fungal infections. *Nat Rev*  
833 *Immunol*, 7(11), 862-874. doi:10.1038/nri2194

- 834 Fisher, N., Shetron-Rama, L., Herring-Palmer, A., Heffernan, B., Bergman, N., & Hanna, P.  
835 (2006). The *dltabcd* operon of *Bacillus anthracis* Sterne is required for virulence and resistance to  
836 peptide, enzymatic, and cellular mediators of innate immunity. *J Bacteriol*, *188*(4), 1301-1309.  
837 doi:10.1128/JB.188.4.1301-1309.2006
- 838 Gobert, V., Gottar, M., Matskevich, A. A., Rutschmann, S., Royet, J., Belvin, M., . . . Ferrandon,  
839 D. (2003). Dual activation of the *Drosophila* Toll pathway by two pattern recognition receptors.  
840 *Science*, *302*(5653), 2126-2130. doi:10.1126/science.1085432 302/5653/2126 [pii]
- 841 Gottar, M., Gobert, V., Michel, T., Belvin, M., Duyk, G., Hoffmann, J. A., . . . Royet, J. (2002).  
842 The *Drosophila* immune response against gram-negative bacteria is mediated by a peptidoglycan  
843 recognition protein. *Nature*, *416*(6881), 640-644. doi:10.1038/nature734 nature734 [pii]
- 844 Grangette, C., Nutten, S., Palumbo, E., Morath, S., Hermann, C., Dewulf, J., . . . Mercenier, A.  
845 (2005). Enhanced anti-inflammatory capacity of a *Lactobacillus plantarum* mutant synthesizing  
846 modified teichoic acids. *Proc Natl Acad Sci U S A*, *102*(29), 10321-10326.  
847 doi:10.1073/pnas.0504084102
- 848 Guo, Y., Li, Z., & Lin, X. (2014). Hs3st-a and Hs3st-b regulate intestinal homeostasis in  
849 *Drosophila* adult midgut. *Cell Signal*, *26*(11), 2317-2325. doi:10.1016/j.cellsig.2014.07.015
- 850 Harrison, D. A., Binari, R., Nahreini, T. S., Gilman, M., & Perrimon, N. (1995). Activation of a  
851 *Drosophila* Janus kinase (*Jak*) causes hematopoietic neoplasia and developmental defects. *EMBO*  
852 *J*, *14*(12), 2857-2865.
- 853 Hayashi, S., Ito, K., Sado, Y., Taniguchi, M., Akimoto, A., Takeuchi, H., . . . Goto, S. (2002).  
854 Getdb, a database compiling expression patterns and molecular locations of a collection of *gal4*  
855 enhancer traps. *Genesis*, *34*(1-2), 58-61. doi:10.1002/gene.10137
- 856 Hayward, A., & Davis, G. (1956). The isolation and classification of *Lactobacillus* strains from  
857 Italian saliva samples. *Br. Dent. J*, *101*, 2733-2741.
- 858 Heaton, M. P., & Neuhaus, F. C. (1992). Biosynthesis of D-alanyl-lipoteichoic acid: Cloning,  
859 nucleotide sequence, and expression of the *Lactobacillus casei* gene for the D-alanine-activating  
860 enzyme. *J Bacteriol*, *174*(14), 4707-4717.
- 861 Heaton, M. P., & Neuhaus, F. C. (1994). Role of the D-alanyl carrier protein in the biosynthesis  
862 of D-alanyl-lipoteichoic acid. *J Bacteriol*, *176*(3), 681-690.
- 863 Hedengren, M., Asling, B., Dushay, M. S., Ando, I., Ekengren, S., Wihlborg, M., & Hultmark,  
864 D. (1999). *Relish*, a central factor in the control of humoral but not cellular immunity in  
865 *Drosophila*. *Molecular Cell*, *4*, 1-20.
- 866 Hold, G. L., Mukhopadhyay, I., & Monie, T. P. (2011). Innate immune sensors and  
867 gastrointestinal bacterial infections. *Clin Dev Immunol*, *2011*, 579650. doi:10.1155/2011/579650
- 868 Iatsenko, I., Boquete, J. P., & Lemaitre, B. (2018). Microbiota-derived lactate activates  
869 production of reactive oxygen species by the intestinal NADPH oxidase Nox and shortens  
870 *Drosophila* lifespan. *Immunity*, *49*(5), 929-942 e925. doi:10.1016/j.immuni.2018.09.017
- 871 Imler, J. L., & Bulet, P. (2005). Antimicrobial peptides in *Drosophila*: Structures, activities and  
872 gene regulation. *Chem Immunol Allergy*, *86*, 1-21. doi:10.1159/000086648

- 873 Jones, R. M., Luo, L., Ardita, C. S., Richardson, A. N., Kwon, Y. M., Mercante, J. W., . . .  
874 Neish, A. S. (2013). Symbiotic lactobacilli stimulate gut epithelial proliferation via nox-mediated  
875 generation of reactive oxygen species. *EMBO J*, 32(23), 3017-3028.  
876 doi:10.1038/emboj.2013.224
- 877 Joo, H. S., Fu, C. I., & Otto, M. (2016). Bacterial strategies of resistance to antimicrobial  
878 peptides. *Philos Trans R Soc Lond B Biol Sci*, 371(1695). doi:10.1098/rstb.2015.0292
- 879 Kamar, R., Rejasse, A., Jehanno, I., Attieh, Z., Courtin, P., Chapot-Chartier, M. P., . . . Sanchis-  
880 Borja, V. (2017). Dltx of bacillus thuringiensis is essential for d-alanylation of teichoic acids and  
881 resistance to antimicrobial response in insects. *Front Microbiol*, 8, 1437.  
882 doi:10.3389/fmicb.2017.01437
- 883 Kaneko, T., Goldman, W. E., Mellroth, P., Steiner, H., Fukase, K., Kusumoto, S., . . . Silverman,  
884 N. (2004). Monomeric and polymeric gram-negative peptidoglycan but not purified lps stimulate  
885 the drosophila imd pathway. *Immunity*, 20(5), 637-649. doi:S1074761304001049 [pii]
- 886 Kaneko, T., Yano, T., Aggarwal, K., Lim, J. H., Ueda, K., Oshima, Y., . . . Silverman, N. (2006).  
887 Pgrp-1c and pgrp-1e have essential yet distinct functions in the drosophila immune response to  
888 monomeric dap-type peptidoglycan. *Nat Immunol*, 7(7), 715-723. doi:ni1356 [pii]  
889 10.1038/ni1356
- 890 Kleerebezem, M., Boekhorst, J., van Kranenburg, R., Molenaar, D., Kuipers, O. P., Leer, R., . . .  
891 Siezen, R. J. (2003). Complete genome sequence of lactobacillus plantarum wcf51. *Proc Natl  
892 Acad Sci U S A*, 100(4), 1990-1995. doi:10.1073/pnas.0337704100
- 893 Kleerebezem, M., Hols, P., Bernard, E., Rolain, T., Zhou, M., Siezen, R. J., & Bron, P. A.  
894 (2010). The extracellular biology of the lactobacilli. *FEMS Microbiol Rev*, 34(2), 199-230.  
895 doi:10.1111/j.1574-6976.2010.00208.x
- 896 Kleino, A., Myllymaki, H., Kallio, J., Vanha-aho, L. M., Oksanen, K., Ulvila, J., . . . Ramet, M.  
897 (2008). Pirk is a negative regulator of the drosophila imd pathway. *J Immunol*, 180(8), 5413-  
898 5422. doi:180/8/5413 [pii]
- 899 Kleino, A., Ramia, N. F., Bozkurt, G., Shen, Y., Nailwal, H., Huang, J., . . . Silverman, N.  
900 (2017). Peptidoglycan-sensing receptors trigger the formation of functional amyloids of the  
901 adaptor protein imd to initiate drosophila nf-kappab signaling. *Immunity*, 47(4), 635-647 e636.  
902 doi:10.1016/j.immuni.2017.09.011
- 903 Koprivnjak, T., & Peschel, A. (2011). Bacterial resistance mechanisms against host defense  
904 peptides. *Cell Mol Life Sci*, 68(13), 2243-2254. doi:10.1007/s00018-011-0716-4
- 905 Kovacs, M., Halfmann, A., Fedtke, I., Heintz, M., Peschel, A., Vollmer, W., . . . Bruckner, R.  
906 (2006). A functional dlt operon, encoding proteins required for incorporation of d-alanine in  
907 teichoic acids in gram-positive bacteria, confers resistance to cationic antimicrobial peptides in  
908 streptococcus pneumoniae. *J Bacteriol*, 188(16), 5797-5805. doi:10.1128/JB.00336-06
- 909 Kristian, S. A., Datta, V., Weidenmaier, C., Kansal, R., Fedtke, I., Peschel, A., . . . Nizet, V.  
910 (2005). D-alanylation of teichoic acids promotes group a streptococcus antimicrobial peptide  
911 resistance, neutrophil survival, and epithelial cell invasion. *J Bacteriol*, 187(19), 6719-6725.  
912 doi:10.1128/JB.187.19.6719-6725.2005

- 913 Kristian, S. A., Lauth, X., Nizet, V., Goetz, F., Neumeister, B., Peschel, A., & Landmann, R.  
914 (2003). Alanylation of teichoic acids protects staphylococcus aureus against toll-like receptor 2-  
915 dependent host defense in a mouse tissue cage infection model. *J Infect Dis*, 188(3), 414-423.  
916 doi:10.1086/376533
- 917 Kurokawa, K., Gong, J. H., Ryu, K. H., Zheng, L., Chae, J. H., Kim, M. S., & Lee, B. L. (2011).  
918 Biochemical characterization of evasion from peptidoglycan recognition by staphylococcus  
919 aureus d-alanylated wall teichoic acid in insect innate immunity. *Dev Comp Immunol*, 35(8),  
920 835-839. doi:10.1016/j.dci.2011.03.001
- 921 Lebeer, S., Vanderleyden, J., & De Keersmaecker, S. C. (2010). Adaptation factors of the  
922 probiotic lactobacillus rhamnosus gg. *Benef Microbes*, 1(4), 335-342. doi:10.3920/BM2010.0032
- 923 Lee, I. C., Tomita, S., Kleerebezem, M., & Bron, P. A. (2013). The quest for probiotic effector  
924 molecules--unraveling strain specificity at the molecular level. *Pharmacol Res*, 69(1), 61-74.  
925 doi:10.1016/j.phrs.2012.09.010
- 926 Lee, W. J., & Brey, P. T. (2013). How microbiomes influence metazoan development: Insights  
927 from history and drosophila modeling of gut-microbe interactions. *Annu Rev Cell Dev Biol*, 29,  
928 571-592. doi:10.1146/annurev-cellbio-101512-122333
- 929 Lemaitre, B., & Hoffmann, J. (2007). The host defense of drosophila melanogaster. *Annu Rev*  
930 *Immunol*, 25, 697-743. doi:10.1146/annurev.immunol.25.022106.141615
- 931 Lereclus, D., Arantes, O., Chaufaux, J., & Lecadet, M. (1989). Transformation and expression of  
932 a cloned delta-endotoxin gene in bacillus thuringiensis. *FEMS Microbiol Lett*, 51(1), 211-217.
- 933 Leulier, F., Parquet, C., Pili-Floury, S., Ryu, J. H., Caroff, M., Lee, W. J., . . . Lemaitre, B.  
934 (2003). The drosophila immune system detects bacteria through specific peptidoglycan  
935 recognition. *Nat Immunol*, 4(5), 478-484. doi:10.1038/ni922 ni922 [pii]
- 936 Lhocine, N., Ribeiro, P. S., Buchon, N., Wepf, A., Wilson, R., Tenev, T., . . . Leulier, F. (2008).  
937 Pims modulates immune tolerance by negatively regulating drosophila innate immune signaling.  
938 *Cell Host Microbe*, 4(2), 147-158. doi:S1931-3128(08)00222-9 [pii]  
939 10.1016/j.chom.2008.07.004
- 940 Licandro-Seraut, H., Scornec, H., Pedron, T., Cavin, J. F., & Sansonetti, P. J. (2014). Functional  
941 genomics of lactobacillus casei establishment in the gut. *Proc Natl Acad Sci U S A*, 111(30),  
942 E3101-3109. doi:10.1073/pnas.1411883111
- 943 Ma, D., Storelli, G., Mitchell, M., & Leulier, F. (2015). Studying host-microbiota mutualism in  
944 drosophila: Harnessing the power of gnotobiotic flies. *Biomed J*, 38(4), 285-293.  
945 doi:10.4103/2319-4170.158620
- 946 Macho Fernandez, E., Pot, B., & Grangette, C. (2011). Beneficial effect of probiotics in ibd: Are  
947 peptidoglycan and nod2 the molecular key effectors? *Gut Microbes*, 2(5), 280-286.  
948 doi:10.4161/gmic.2.5.18255
- 949 Macho Fernandez, E., Valenti, V., Rockel, C., Hermann, C., Pot, B., Boneca, I. G., & Grangette,  
950 C. (2011). Anti-inflammatory capacity of selected lactobacilli in experimental colitis is driven by  
951 nod2-mediated recognition of a specific peptidoglycan-derived muropeptide. *Gut*, 60(8), 1050-  
952 1059. doi:10.1136/gut.2010.232918

- 953 Matos, R. C., Schwarzer, M., Gervais, H., Courtin, P., Joncour, P., Gillet, B., . . . Leulier, F.  
954 (2017). D-alanylation of teichoic acids contributes to lactobacillus plantarum-mediated  
955 drosophila growth during chronic undernutrition. *Nat Microbiol*, 2(12), 1635-1647.  
956 doi:10.1038/s41564-017-0038-x
- 957 Medzhitov, R. (2007). Recognition of microorganisms and activation of the immune response.  
958 *Nature*, 449(7164), 819-826. doi:10.1038/nature06246
- 959 Mellroth, P., Karlsson, J., & Steiner, H. (2003). A scavenger function for a drosophila  
960 peptidoglycan recognition protein. *J Biol Chem*, 278(9), 7059-7064.
- 961 Mellroth, P., & Steiner, H. (2006). Pgrp-sb1: An n-acetylmuramoyl l-alanine amidase with  
962 antibacterial activity. *Biochem Biophys Res Commun*, 350(4), 994-999.
- 963 Michel, T., Reichhart, J. M., Hoffmann, J. A., & Royet, J. (2001). Drosophila toll is activated by  
964 gram-positive bacteria through a circulating peptidoglycan recognition protein. *Nature*,  
965 414(6865), 756-759. doi:10.1038/414756a 414756a [pii]
- 966 Nehme, N. T., Liegeois, S., Kele, B., Giammarinaro, P., Pradel, E., Hoffmann, J. A., . . .  
967 Ferrandon, D. (2007). A model of bacterial intestinal infections in drosophila melanogaster.  
968 *PLoS Pathog*, 3(11), e173. doi:07-PLPA-RA-0055 [pii] 10.1371/journal.ppat.0030173
- 969 Neuhaus, F. C., & Baddiley, J. (2003). A continuum of anionic charge: Structures and functions  
970 of d-alanyl-teichoic acids in gram-positive bacteria. *Microbiol Mol Biol Rev*, 67(4), 686-723.
- 971 Newell, P. D., Chaston, J. M., Wang, Y., Winans, N. J., Sannino, D. R., Wong, A. C., . . .  
972 Douglas, A. E. (2014). In vivo function and comparative genomic analyses of the drosophila gut  
973 microbiota identify candidate symbiosis factors. *Front Microbiol*, 5, 576.  
974 doi:10.3389/fmicb.2014.00576
- 975 Palumbo, E., Deghorain, M., Cocconcelli, P. S., Kleerebezem, M., Geyer, A., Hartung, T., . . .  
976 Hols, P. (2006). D-alanyl ester depletion of teichoic acids in lactobacillus plantarum results in a  
977 major modification of lipoteichoic acid composition and cell wall perforations at the septum  
978 mediated by the acm2 autolysin. *J Bacteriol*, 188(10), 3709-3715. doi:10.1128/JB.188.10.3709-  
979 3715.2006
- 980 Paredes, J. C., Welchman, D. P., Poidevin, M., & Lemaitre, B. (2011). Negative regulation by  
981 amidase pgrps shapes the drosophila antibacterial response and protects the fly from innocuous  
982 infection. *Immunity*, 35(5), 770-779. doi:S1074-7613(11)00466-3 [pii]  
983 10.1016/j.immuni.2011.09.018
- 984 Perea Velez, M., Verhoeven, T. L., Draing, C., Von Aulock, S., Pfitzenmaier, M., Geyer, A., . . .  
985 De Keersmaecker, S. C. (2007). Functional analysis of d-alanylation of lipoteichoic acid in the  
986 probiotic strain lactobacillus rhamnosus gg. *Appl Environ Microbiol*, 73(11), 3595-3604.  
987 doi:10.1128/AEM.02083-06
- 988 Perego, M., Glaser, P., Minutello, A., Strauch, M. A., Leopold, K., & Fischer, W. (1995).  
989 Incorporation of d-alanine into lipoteichoic acid and wall teichoic acid in bacillus subtilis.  
990 Identification of genes and regulation. *J Biol Chem*, 270(26), 15598-15606.
- 991 Peschel, A., Otto, M., Jack, R. W., Kalbacher, H., Jung, G., & Gotz, F. (1999). Inactivation of  
992 the dlt operon in staphylococcus aureus confers sensitivity to defensins, protegrins, and other  
993 antimicrobial peptides. *J Biol Chem*, 274(13), 8405-8410.



- 994 Poyart, C., Pellegrini, E., Marceau, M., Baptista, M., Jaubert, F., Lamy, M. C., & Trieu-Cuot, P.  
995 (2003). Attenuated virulence of streptococcus agalactiae deficient in d-alanyl-lipoteichoic acid is  
996 due to an increased susceptibility to defensins and phagocytic cells. *Mol Microbiol*, 49(6), 1615-  
997 1625.
- 998 Ragland, S. A., & Criss, A. K. (2017). From bacterial killing to immune modulation: Recent  
999 insights into the functions of lysozyme. *PLoS Pathog*, 13(9), e1006512.  
1000 doi:10.1371/journal.ppat.1006512
- 1001 Ramet, M., Manfruelli, P., Pearson, A., Mathey-Prevot, B., & Ezekowitz, R. A. (2002).  
1002 Functional genomic analysis of phagocytosis and identification of a drosophila receptor for e.  
1003 Coli. *Nature*, 416(6881), 644-648. doi:10.1038/nature735 nature735 [pii]
- 1004 Reichhart, J. M., Ligoxygakis, P., Naitza, S., Woerfel, G., Imler, J. L., & Gubb, D. (2002).  
1005 Splice-activated uas hairpin vector gives complete rnai knockout of single or double target  
1006 transcripts in drosophila melanogaster. *Genesis*, 34(1-2), 160-164.
- 1007 Ryu, J. H., Kim, S. H., Lee, H. Y., Bai, J. Y., Nam, Y. D., Bae, J. W., . . . Lee, W. J. (2008).  
1008 Innate immune homeostasis by the homeobox gene caudal and commensal-gut mutualism in  
1009 drosophila. *Science*, 319(5864), 777-782. doi:1149357 [pii] 10.1126/science.1149357
- 1010 Ryu, J. H., Nam, K. B., Oh, C. T., Nam, H. J., Kim, S. H., Yoon, J. H., . . . Lee, W. J. (2004).  
1011 The homeobox gene caudal regulates constitutive local expression of antimicrobial peptide genes  
1012 in drosophila epithelia. *Mol Cell Biol*, 24(1), 172-185.
- 1013 Sharon, G., Segal, D., Ringo, J. M., Hefetz, A., Zilber-Rosenberg, I., & Rosenberg, E. (2010).  
1014 Commensal bacteria play a role in mating preference of drosophila melanogaster. *Proc Natl*  
1015 *Acad Sci U S A*, 107(46), 20051-20056. doi:1009906107 [pii] 10.1073/pnas.1009906107
- 1016 Shin, S. C., Kim, S. H., You, H., Kim, B., Kim, A. C., Lee, K. A., . . . Lee, W. J. (2011).  
1017 Drosophila microbiome modulates host developmental and metabolic homeostasis via insulin  
1018 signaling. *Science*, 334(6056), 670-674. doi:10.1126/science.1212782
- 1019 Smelt, M. J., de Haan, B. J., Bron, P. A., van Swam, I., Meijerink, M., Wells, J. M., . . . de Vos,  
1020 P. (2013). The impact of lactobacillus plantarum wcf51 teichoic acid d-alanylation on the  
1021 generation of effector and regulatory t-cells in healthy mice. *PLoS One*, 8(4), e63099.  
1022 doi:10.1371/journal.pone.0063099
- 1023 Staubach, F., Baines, J. F., Kunzel, S., Bik, E. M., & Petrov, D. A. (2013). Host species and  
1024 environmental effects on bacterial communities associated with drosophila in the laboratory and  
1025 in the natural environment. *PLoS One*, 8(8), e70749. doi:10.1371/journal.pone.0070749
- 1026 Stein, D., Roth, S., Vogelsang, E., & Nüsslein-Volhard, C. (1991). The polarity of the  
1027 dorsoventral axis of the drosophila embryo is defined by an extracellular signal. *Cell*, 65, 725-  
1028 735.
- 1029 Stenbak, C. R., Ryu, J. H., Leulier, F., Pili-Floury, S., Parquet, C., Herve, M., . . . Mengin-  
1030 Lecreulx, D. (2004). Peptidoglycan molecular requirements allowing detection by the drosophila  
1031 immune deficiency pathway. *J Immunol*, 173(12), 7339-7348. doi:173/12/7339 [pii]
- 1032 Storelli, G., Defaye, A., Erkosar, B., Hols, P., Royet, J., & Leulier, F. (2011). Lactobacillus  
1033 plantarum promotes drosophila systemic growth by modulating hormonal signals through tor-

- 1034 dependent nutrient sensing. *Cell Metab*, 14(3), 403-414. doi:S1550-4131(11)00306-8 [pii]  
1035 10.1016/j.cmet.2011.07.012
- 1036 Tabuchi, Y., Shiratsuchi, A., Kurokawa, K., Gong, J. H., Sekimizu, K., Lee, B. L., & Nakanishi,  
1037 Y. (2010). Inhibitory role for d-alanylation of wall teichoic acid in activation of insect toll  
1038 pathway by peptidoglycan of staphylococcus aureus. *J Immunol*, 185(4), 2424-2431.  
1039 doi:10.4049/jimmunol.1000625
- 1040 Takehana, A., Yano, T., Mita, S., Kotani, A., Oshima, Y., & Kurata, S. (2004). Peptidoglycan  
1041 recognition protein (pgrp)-Ie and pgrp-Ic act synergistically in drosophila immunity. *EMBO J*,  
1042 23(23), 4690-4700. doi:7600466 [pii] 10.1038/sj.emboj.7600466
- 1043 Travassos, L. H., Girardin, S. E., Philpott, D. J., Blanot, D., Nahori, M. A., Werts, C., & Boneca,  
1044 I. G. (2004). Toll-like receptor 2-dependent bacterial sensing does not occur via peptidoglycan  
1045 recognition. *EMBO Rep*, 5(10), 1000-1006. doi:10.1038/sj.embor.7400248
- 1046 Walter, J., Loach, D. M., Alqumber, M., Rockel, C., Hermann, C., Pfizenmaier, M., & Tannock,  
1047 G. W. (2007). D-alanyl ester depletion of teichoic acids in lactobacillus reuteri 100-23 results in  
1048 impaired colonization of the mouse gastrointestinal tract. *Environ Microbiol*, 9(7), 1750-1760.  
1049 doi:10.1111/j.1462-2920.2007.01292.x
- 1050 Wells, J. M. (2011). Immunomodulatory mechanisms of lactobacilli. *Microb Cell Fact*, 10 Suppl  
1051 1, S17. doi:10.1186/1475-2859-10-S1-S17
- 1052 Wolfert, M. A., Roychowdhury, A., & Boons, G. J. (2007). Modification of the structure of  
1053 peptidoglycan is a strategy to avoid detection by nucleotide-binding oligomerization domain  
1054 protein 1. *Infect Immun*, 75(2), 706-713. doi:10.1128/IAI.01597-06
- 1055 Wong, A. C., Dobson, A. J., & Douglas, A. E. (2014). Gut microbiota dictates the metabolic  
1056 response of drosophila to diet. *J Exp Biol*, 217(Pt 11), 1894-1901. doi:10.1242/jeb.101725
- 1057 Wong, C. N., Ng, P., & Douglas, A. E. (2011). Low-diversity bacterial community in the gut of  
1058 the fruitfly drosophila melanogaster. *Environ Microbiol*, 13(7), 1889-1900. doi:10.1111/j.1462-  
1059 2920.2011.02511.x
- 1060 Zaidman-Remy, A., Herve, M., Poidevin, M., Pili-Floury, S., Kim, M. S., Blanot, D., . . .  
1061 Lemaitre, B. (2006). The drosophila amidase pgrp-Ib modulates the immune response to  
1062 bacterial infection. *Immunity*, 24(4), 463-473. doi:S1074-7613(06)00177-4 [pii]  
1063 10.1016/j.immuni.2006.02.012

## 1 Figures supplements

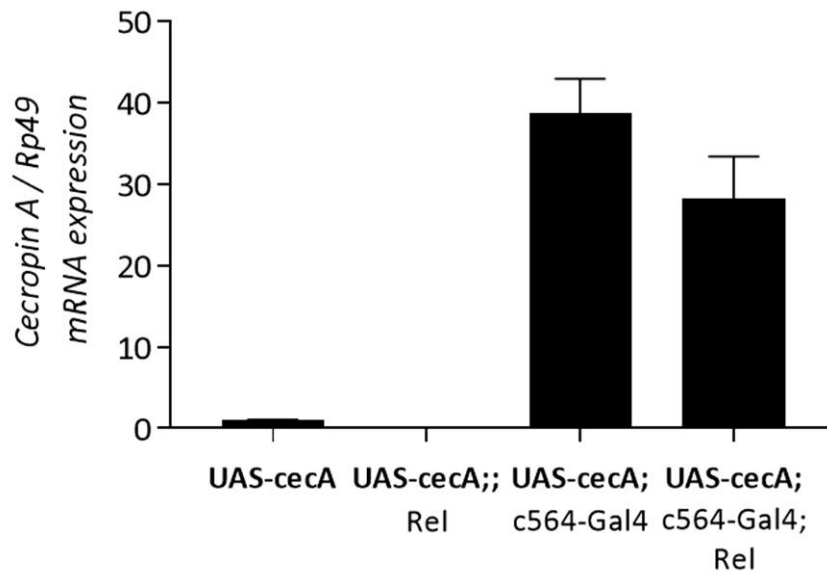

2

### 3 Figure 1 – figure supplement 1: Overexpression of *CecropinA* gene.

4 The expression of a *Cecropin A* transgene (UAS-cec) was driven using a fat body driver, c564-Gal4, in wild-type  
5 (wt) or *Rel* mutant flies. The *Cecropin A* expression was quantified by RT-qPCR from the RNA extracts of adult  
6 flies following their incubation for 6 days at 29 °C. Wt flies carrying the UAS- cec transgene were used as control.  
7 Data obtained from three independent experiments are combined in single value (mean ± sd).

8

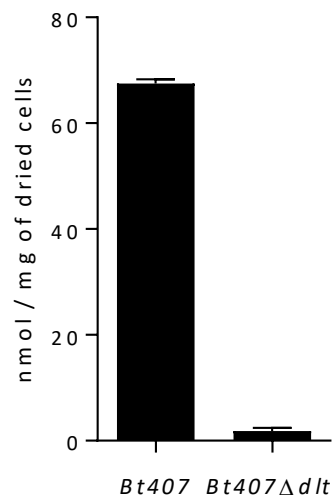

9

10 **Figure 1 – figure supplement 2: Amounts of D-alanine released from whole cells by alkaline hydrolysis for**  
11 **the wild type and the *dlt* mutant strains of *Bt407*.**

12 Data obtained from three independent experiments are combined in single value (mean ± sd).

**A**

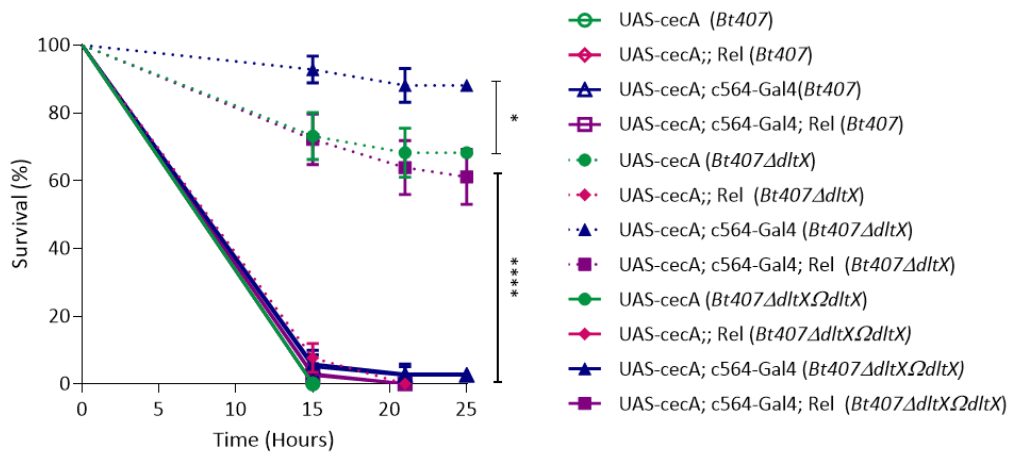

**B**

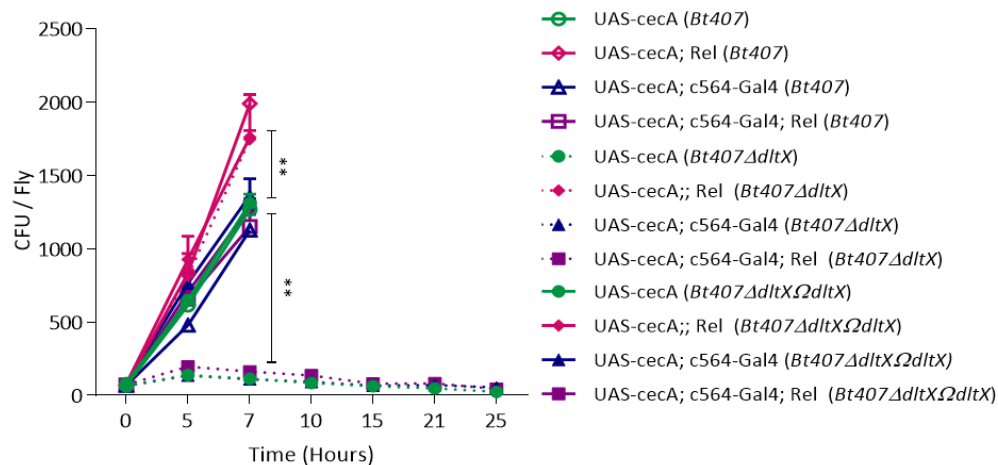

13

14 **Figure 1 – figure supplement 3: Complementation of the *Bt407ΔdltX* mutant with the *dltX-ORF***  
 15 **(*Bt407ΔdltXΩdltX*) completely restores its virulence similarly to the wt *Bt407* strain.**

16 (A) Survival of adult wild-type (wt) or relish (Rel) mutant, overexpressing or not a *Cecropin* transgene (under the  
 17 control of the c564-Gal4 fat body driver) to an infection with *Bt407*, *Bt407ΔdltX* and *Bt407ΔdltX ΩdltX*  
 18 (B) Internal bacterial loads retrieved from adult flies infected with *BT407* and *Bt407ΔdltX* or *Bt407ΔdltX ΩdltX*.  
 19 The Colony Forming Unit (CFU) counting was performed only on survival flies.  
 20 Data are pooled from three independent experiments (mean and s.d.). Statistical tests were performed using the  
 21 Log Rank test for the survival assays and Mann-Whitney test for the CFU counting within Prism software (ns:  $p >$   
 22 0.05; \*  $0.01 < p < 0.05$ ; \*\*:  $0.001 < p < 0.01$ ; \*\*\*:  $0.0001 < p < 0.001$ ; \*\*\*\*:  $p < 0.0001$ ).

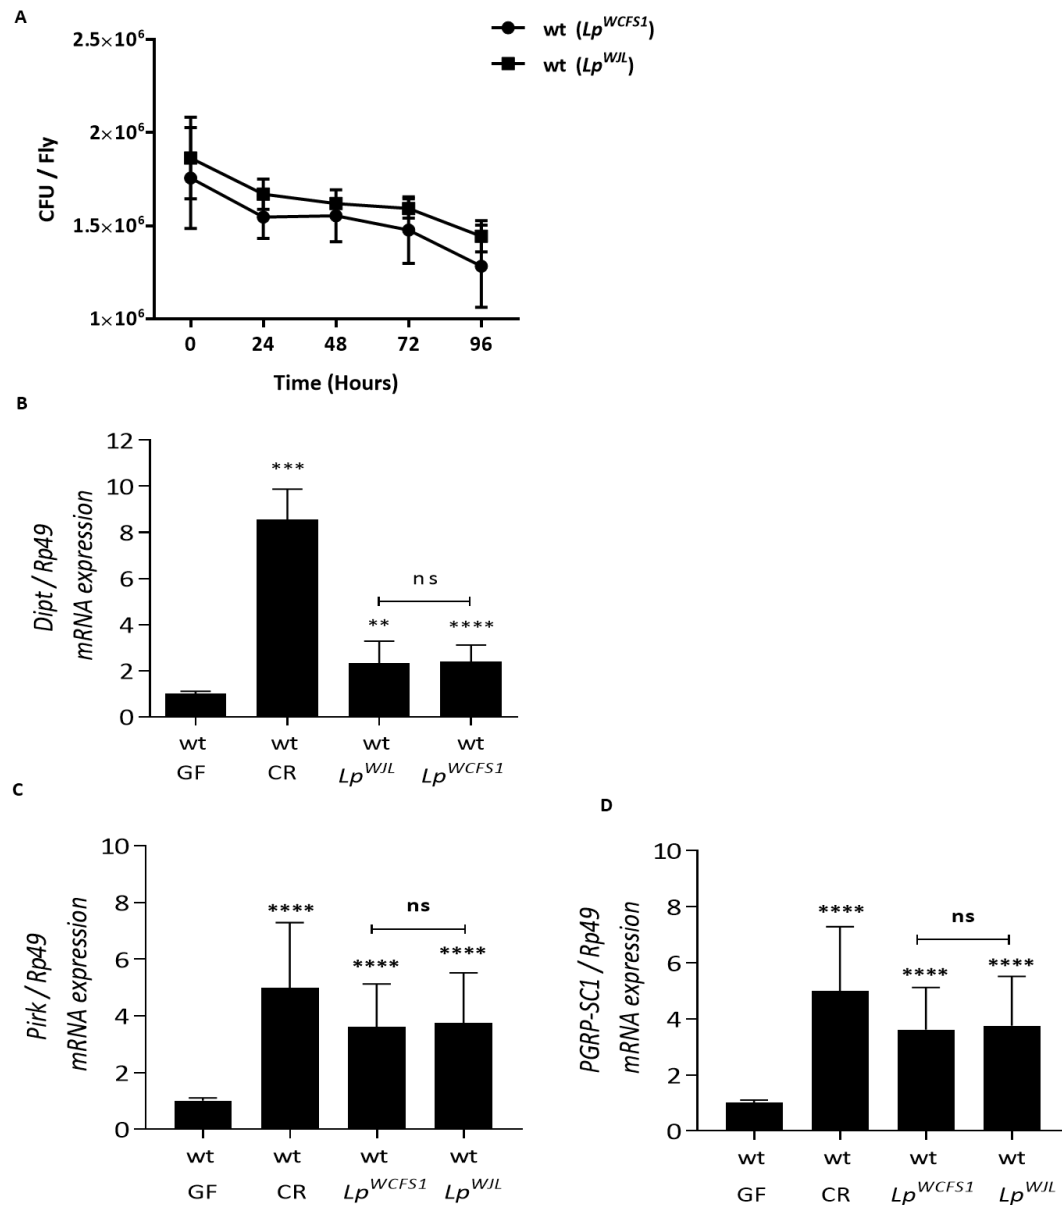

23

24 **Figure 3 – figure supplement 1:  $Lp^{WCFS1}$  strain shares with  $Lp^{WJL}$  strain the ability to colonize the *Drosophila* gut**  
 25 **and to induce the IMD pathway.**

26 (A) Internal bacterial loads retrieved from the guts of Germ Free (GF) wild-type (wt) flies fed with  $Lp^{WCFS1}$  or  $Lp^{WJL}$   
 27 for three days. Colony Forming Unit (CFU) counting was performed every 24 hours after transferring the  
 28 monoassociated flies to a fresh cornmeal medium vial.

29 (B, C and D) Relative expression of the *Diptericin* (*Dipt*) (B) *Pirk* (C) and *PGRP-SC1* (D) transcripts in the midgut of  
 30 Germ Free (GF) wild-type (wt) flies fed with  $Lp^{WCFS1}$  or  $Lp^{WJL}$  for 3 days. Transcripts expression was measured by RT-  
 31 qPCR in total RNA extracts. Ribosomal protein 49 (Rp49) transcript was used as reference gene. Transcripts levels  
 32 detected in GF flies is set as a control.

33 Data obtained from three independent experiments are combined in single value (mean  $\pm$  sd). Statistical tests were  
 34 performed using the Mann-Whitney test within Prism software (ns:  $p > 0.05$ ; \*:  $0.01 < p < 0.05$ ; \*\*:  $0.001 < p < 0.01$ ;  
 35 \*\*\*:  $0.0001 < p < 0.001$ ; \*\*\*\*:  $p < 0.0001$ ).

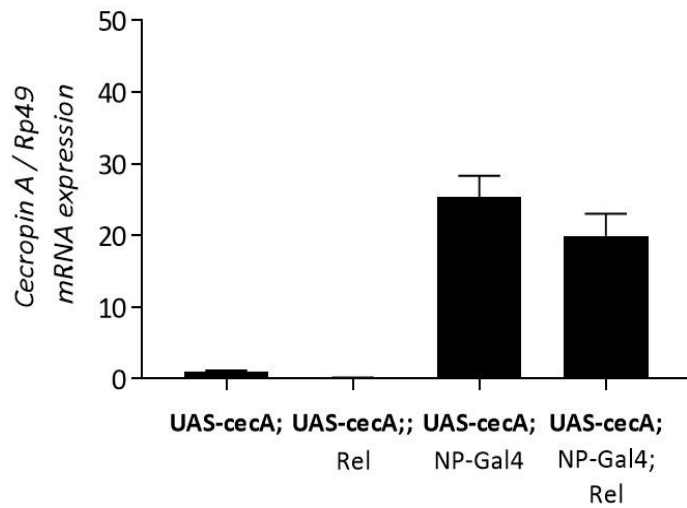

36

37 **Figure 3 – figure supplement 2: Overexpression of *Cecropin A* gene in the gut of adult flies.**

38 The expression of a *cecropin A* transgene (UAS-cec) was driven using a midgut specific driver, NP-Gal4, in wild-type  
39 (wt) or *Rel* mutant flies. The *cecropin A* expression was quantified by RT-qPCR from the RNA extracts of dissected  
40 midguts of adult flies following their incubation for 3 days at 29 °C. Wt flies carrying the UAS-cec transgene were  
41 used as control. Data obtained from three independent experiments are combined in single value (mean ± sd).

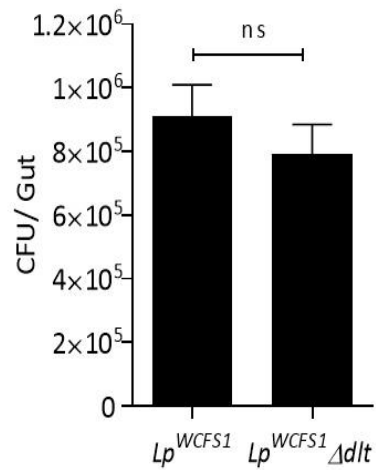

42

43 **Figure 3 – figure supplement 3: Internal bacterial loads retrieved from the guts of Germ Free (GF) wild-type**  
44 **flies fed with  $Lp^{WCFS1}$  or  $Lp^{WCFS1\Delta dlt}$  for three days.**

45 Data obtained from three independent experiments are combined in single value (mean  $\pm$  sd). Statistical tests were  
46 performed using the Mann-Whitney test within Prism software (ns:  $p > 0.05$ )



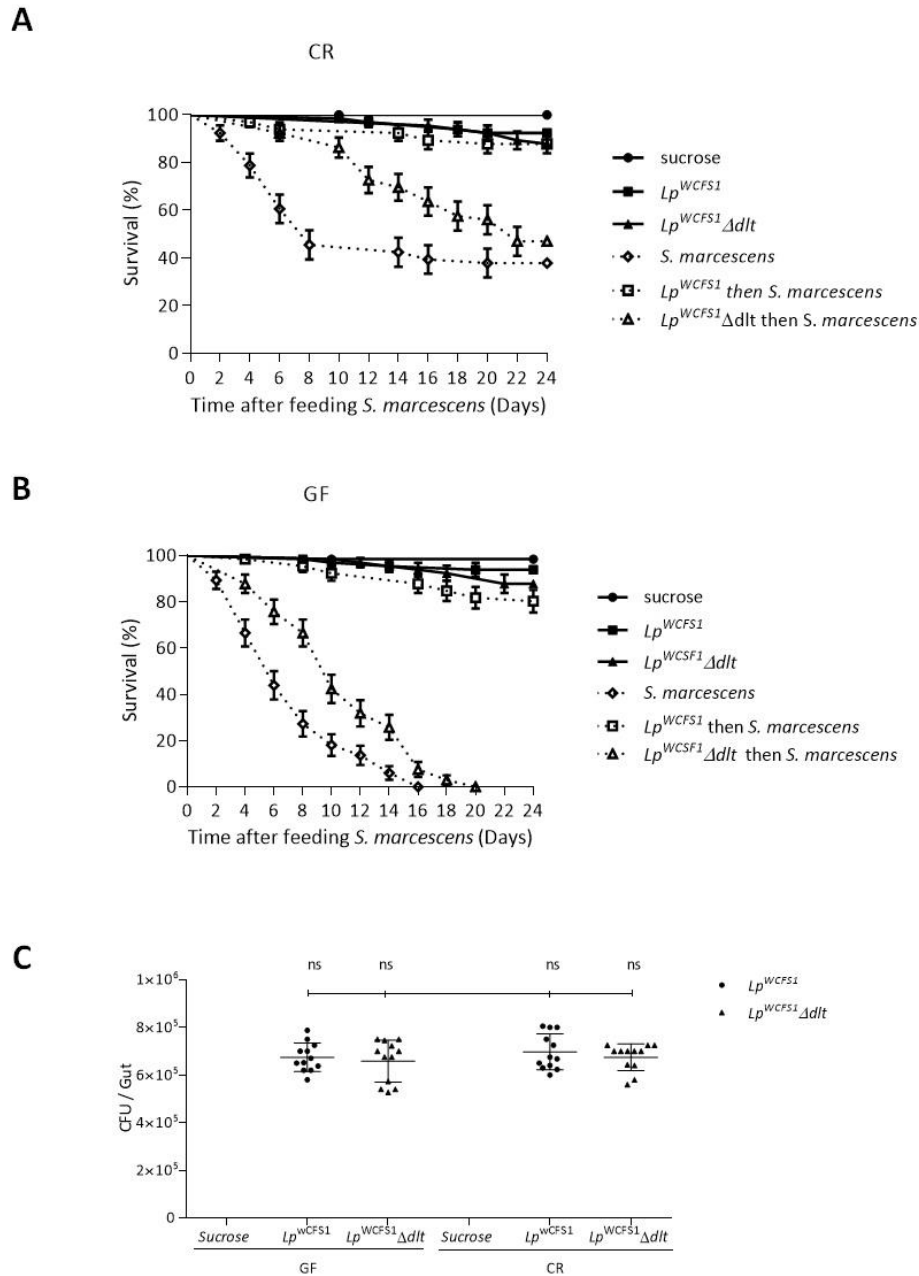

47

48 **Figure 3 – figure supplement 4: D-alanylation of WTAs are essential for the probiotic effect of *Lp*<sup>WCSF1</sup> in**  
 49 ***Drosophila*.**

50 (A and B) Conventionally reared (CR) (A) and Germ Free (GF) (B) wt flies were fed with *Lp*<sup>WCSF1</sup> or *Lp*<sup>WCSF1</sup>  $\Delta$ dlt for  
 51 3 days prior to *S. marcescens* challenge. Flies were fed a sucrose suspension of *S. marcescens* for 2 days and then  
 52 transferred to a fresh cornmeal vial.

53 (C) Internal bacterial loads retrieved from the guts of Germ Free (GF) or conventionally reared (CR) wt flies fed with  
 54 *Lp*<sup>WCSF1</sup> or *Lp*<sup>WCSF1</sup>  $\Delta$ dlt for three days.

55 Data obtained from three independent experiments are combined in single value (mean  $\pm$  sd). Statistical tests were  
 56 performed using the Mann-Whitney test within Prism software (ns:  $p > 0.05$ ).

57

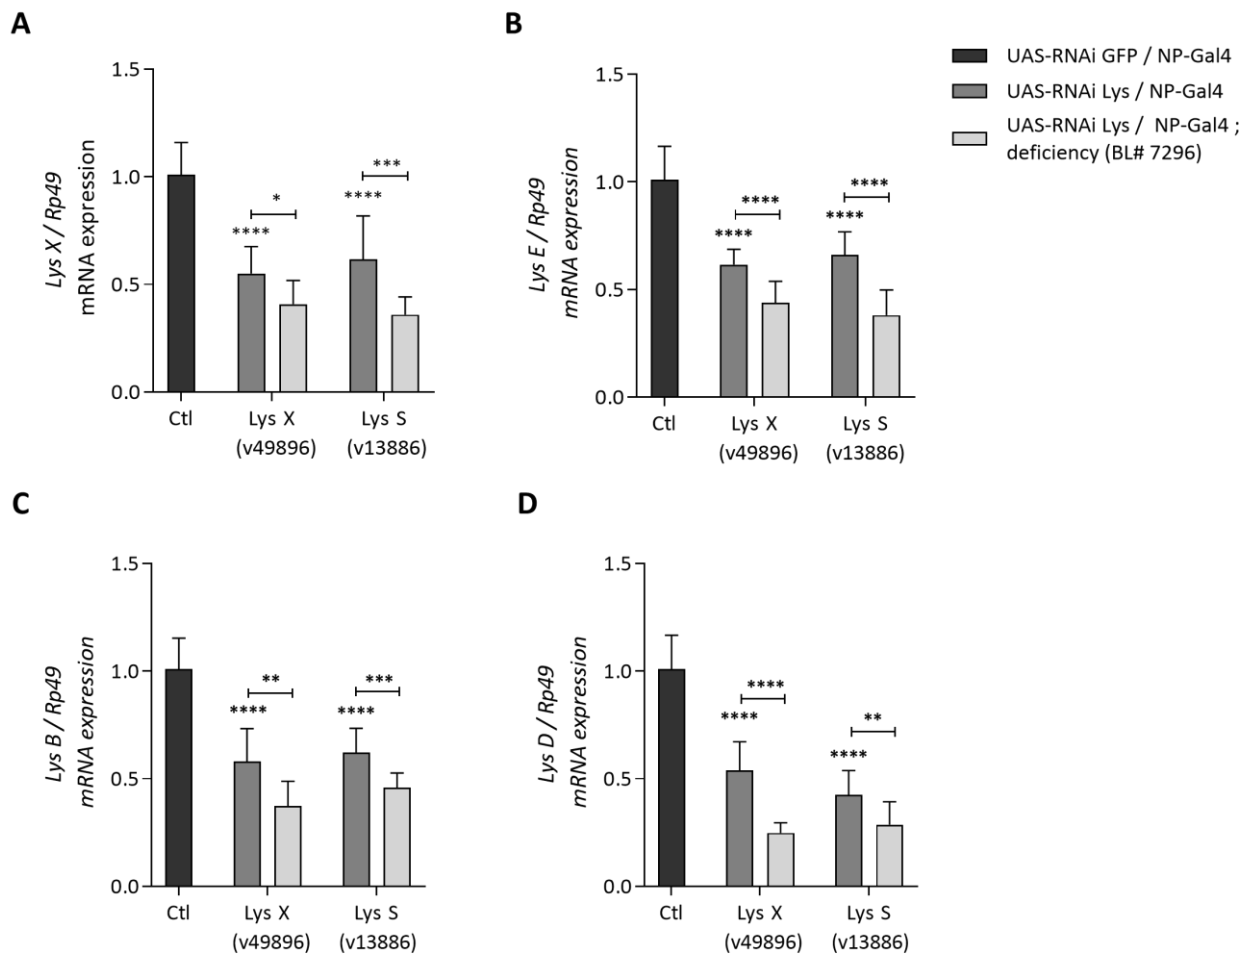

58

59 **Figure 5 – figure supplement 1: RNAi silencing of lysozyme genes in the gut.**

60 Silencing of the lysozyme genes was performed by the expression of RNAi constructs (UAS-RNAi) in the gut of  
 61 adult flies using the midgut specific driver NP-Gal4. Two different transgenic fly lines (v49896) and (v13886)  
 62 were used. These harbor different RNAi construct targeting the *LysX* or the *LysS* transcripts respectively. Silencing of  
 63 lysozyme genes is further aggravated by crossing these transgenic flies to a fly line carrying a chromosomal deletion  
 64 (deficiency BL#7296) uncovering the Lysozyme locus in the *Drosophila* genome. A transgenic line expressing an  
 65 RNAi construct targeting the GFP transcript is used as a control. Relative expression of the *Lysozymes X* (A), *E* (B),  
 66 *B*(C) and *D* (D) transcripts is measured in total RNA extracts from the midgut of the transgenic flies of the different  
 67 genetic background Ribosomal protein 49 (Rp49) transcript was used as reference gene. Transcripts levels are  
 68 compared to that detected in UAS-RNAi GFP transgenic flies that is arbitrary set to 1.

69 Data obtained from three independent experiments are combined in single value (mean  $\pm$  sd). Statistical tests were  
 70 performed using the Mann-Whitney test within Prism software (ns:  $p > 0.05$ ; \*:  $0.01 < p < 0.05$ ; \*\*:  $0.001 < p < 0.01$ ;  
 71 \*\*\*:  $0.0001 < p < 0.001$ ; \*\*\*\*:  $p < 0.0001$ ).
